# Supplementary material for: Upcycling plant waste: iron nanoparticles synthesized from Cannabis sativa enhance biomass and antioxidative properties in soybean (Glycine max)
Source: Royal Society of Chemistry journal article supplement (doi:10.1039/d4en01018c), 2025-01-01
Supplement: d4en01018c12.pdf [file d4en01018c12.pdf]

## Upcycling plant waste: Iron nanoparticles synthesized from *Cannabis sativa* enhance biomass and antioxidative properties in soybean (*Glycine max*)

Milica Pavlicevic\*,<sup>a</sup> Shital Vaidya,<sup>a</sup> Terri Arsenault,<sup>a</sup> Anuja Bharadwaj,<sup>a</sup> Nubia Zuverza-Mena,<sup>a</sup> Craig Musante,<sup>a</sup>  
Yingxue Yu,<sup>b</sup> Itamar Shabtai,<sup>b</sup> Joseph Liquori,<sup>c</sup> Jose A. Hernandez-Viezcas,<sup>d</sup> Vinka Oyanedel-Craver,<sup>e</sup> Jorge L Gardea-  
Torresdey,<sup>d</sup> Christian O. Dimkpa,<sup>a</sup> and Jason C. White<sup>a</sup>

### Supplementary Material

Table S1: Wavenumber range assigned to different bonds and compounds

| Wavenumber range | Bonds                       | Compounds         |
|------------------|-----------------------------|-------------------|
| 3591 – 3221      | O-H stretching              | Alcohols, phenols |
| 3169 - 3013      | C-H stretching              | Aromatics         |
| 2989 - 2805      | C-H stretching              | Alkanes           |
| 1751 - 1703      | C=O stretching              | Esters            |
| 1740 - 1711      | H-C=O: C-H stretching       | Aldehydes         |
| 1628 - 1579      | C-C stretching (in ring)    | Aromatics         |
| 1476 - 1316      | C-H bending and C-H rocking | Alkanes           |
| 1346 - 1305      | C-O-C stretching            | Ethers            |
| 1268 - 1132      | C-N stretching              | Aliphatic amines  |
| 911 - 822        | C-O bend                    | Carboxylic acids  |

Table S2: Composition of extract from *Cannabis sativa* ssp. *sativa* and *Cannabis sativa* ssp. *indica*

| Compounds present in both extracts | Compounds present in extract from <i>Cannabis sativa</i> ssp. <i>sativa</i> | Compounds present in extract from <i>Cannabis sativa</i> ssp. <i>indica</i> |
|------------------------------------|-----------------------------------------------------------------------------|-----------------------------------------------------------------------------|
|------------------------------------|-----------------------------------------------------------------------------|-----------------------------------------------------------------------------|

| <i>Compound</i>                                                         | <i>Target response</i> | <i>Compound</i>                                                                        | <i>Target response</i> | <i>Compound</i>                                                                        | <i>Target response</i> |
|-------------------------------------------------------------------------|------------------------|----------------------------------------------------------------------------------------|------------------------|----------------------------------------------------------------------------------------|------------------------|
| Bicyclo[3.1.1]hept-2-ene                                                | 6332.3s; 12529.1i      | alpha-Gurjunene                                                                        | 42224                  | Alloaromadendrene                                                                      | 52840                  |
| Caryophyllene                                                           | 114662s; 61714i        | Guaiol                                                                                 | 157841                 | Eudesma-3,7(11)-diene                                                                  | 15566.5                |
| (E)-beta-Famesene                                                       | 132968s; 241704i       | 10-epi-gamma-eudesmol                                                                  | 137041                 | gamma-Selinene                                                                         | 106021                 |
| beta-Bisabolene                                                         | 47549s; 2156i          | 1H-4-Oxabenzo(f)cyclobut(cd)inden-8-ol                                                 | 589                    | 1,5-Cyclodecadiene                                                                     | 117654                 |
| alpha-Humulene                                                          | 105920s; 45452i        | Ethyl (E)-3-fluoro-2-[(trimethylsilyl)methyl]-2-butenolate                             | 3145                   | Ethyl 9-hexadecenoate                                                                  | 5083.1                 |
| alpha-Bisabolol                                                         | 661806s; 162137i       | Octacosane                                                                             | 3284899                | Methyl stearate                                                                        | 16474.1                |
| 2-(4a,8-dimethyl-1,2,3,4,4a,5,6,8a-octahydro-2-naphthalenyl)-2-propanol | 3321s;1945i            | Squalene                                                                               | 15036                  | 8,11-Octadecadienoic acid                                                              | 24821                  |
| 2-Naphthalenemethanol                                                   | 205615s; 53309i        | Docosane                                                                               | 2341                   | 1-Amino-3,4-dihydro-3-methyl-4-phenyl-2-naphthalenecarbonitrile                        | 1078                   |
| Benzoic acid                                                            | 51629s; 29675i         | Valencene                                                                              | 30486                  | 4-(2-furyl)-6-(1-piperidinyl)-1,3,5-triazin-2-ylamine                                  | 692                    |
| Hexadecanoic acid                                                       | 33077s; 34849i         | (+)-Aromadendrene                                                                      | 895                    | 3-Chloroformanilide                                                                    | 112173                 |
| 9,12,15-Octadecatrienoic acid                                           | 3820s; 8294i           | 8-hydroxy-1-methoxycarbonyl-5,6,7,8-tetrahydronaphtalene                               | 895                    | Geranyl linalool isomer                                                                | 172735                 |
| Phytol                                                                  | 183491s; 17398i        | (3E)-4-(1,2-Epoxy-2,6,6-trimethylcyclohexyl)-3-buten-2-on-ethylenacetal                | 9885                   | benzo[a]phenanthridin-8(7H)-one                                                        | 172735                 |
| Octadecanoic acid                                                       | 17949.5s; 6065.5i      | 1H-Cycloprop[e]azulene                                                                 | 689                    | 1H-Indole-3-butanoic acid                                                              | 400459                 |
| Dronabiol                                                               | 61812s; 43933i         | Linoleic acid ethyl ester                                                              | 20218                  | 4,4-Dimethyl-13-alpha-androst-5-ene                                                    | 407389                 |
| Cannabichromene                                                         | 2465125s; 33027195i    | 6-acetyl-7-hydroxy-2,2-dimethylbenzopyran                                              | 7913                   | 5H,10H-Diimidazo[1,5-a:1',5'-d]pyrazine-5,10-dione                                     | 210197                 |
| THC                                                                     | 8806414s; 18968384i    | 7-(bis(4-methoxyphenyl)methylene)-7H-bicyclo[4.1.0]hepta-1,3,5-triene                  | 8765                   | ethyl 2-(2-methyl-1-hexenyl)indole-3-carboxylate                                       | 158295                 |
| CBD                                                                     | 5369s; 1876339i        | p-Octylacetophenone                                                                    | 58613                  | 4-Cyclohexyl-2-methyl-1-(4-methylphenyl)-6-phenyl-5-(3-propynyl)-1,2-dihydropyrimidine | 183809                 |
| Naphtalene                                                              | 1610836s; 424977i      | Muscovopyridine                                                                        | 427237                 | 1,3,5,7,9,11,13,15,17,19,21,23-Cyclotetracosadodecaene                                 | 97456                  |
| 6H-Dibenzo[b,d]pyran-1-ol                                               | 64455s; 622i           | 6-Imino-8-(4'-nitrophenyl)-2,3,4,6-tetrahydropyrido[2,1-b][1,3]thiazine-7-carbonitrile | 173639                 | 4(3H)-Quinazolinone                                                                    | 186800                 |
| 2H-1-benzopyran-5-ol                                                    | 34s; 46i               | 2-benzoyl-6,7-dimethoxy-4-methylidene-2H-1,3-benzothiazine                             | 3125                   | cis-5,6,6a,11,12,12a-Hexahydro-5,11-dimethylpentaleno[2.1-b:5,4-b]diindole             | 2638072                |
| Nonanoic acid                                                           | 95417s; 208253i        | 5,10-seco-3'H-cyclopropa[2,3]cholestan-1(10)-                                          |                        | beta-Amyrin                                                                            | 102363                 |
| 2,6,10,14,18,22-tetracosahexane                                         | 82307s; 57453i         |                                                                                        |                        | alpha-Amyrin                                                                           | 191026                 |
| Anthracene                                                              | 20584s; 7386i          |                                                                                        |                        | 12-Oleanen-3-yl acetate                                                                | 105367                 |
| Neophytadiene                                                           | 49180s; 43544i         |                                                                                        |                        | Morphinan                                                                              | 1826                   |
| Vitamin E                                                               | 8914s;3524i            |                                                                                        |                        |                                                                                        |                        |
| Campesterol                                                             |                        |                                                                                        |                        |                                                                                        |                        |

|                                   |                  |                                                                         |          |                                                                    |        |
|-----------------------------------|------------------|-------------------------------------------------------------------------|----------|--------------------------------------------------------------------|--------|
| Stigmasterol                      | 997647s; 389939i | en-5-one                                                                | 12895    | Urs-12-en-24-oic acid                                              | 60408  |
| Propanol                          | 12028s; 14348i   | 1-Triacontanol                                                          | 906      | Methyl 8-hydroxy-3,6-dimethoxy-1-methylanthraquinone-2-carboxylate | 185784 |
| Limonene                          | 59030s; 73632i   | Cholest-5-en-3-ol                                                       |          |                                                                    | 47142  |
| 1-Hydroxy-2-propanone             | 5464s; 6875i     | alpha-Eudesmol                                                          | 463729   | Myrcene                                                            |        |
| 1-Dodecene                        | 60114s; 12704i   | Cannabicitran                                                           | 25281    | 4-dodecyne                                                         | 3255   |
| Elemene                           | 6070s; 6632i     | 2,2,3,3-tetrafluoro-5-(1,1,2,2-tetrafluoroethoxy)-2,3-dihydrobenzofuran | 488468   |                                                                    | 172735 |
| (23S)-ethylcholest-5-en-3-beta-ol | 463729s; 303939i |                                                                         | 57672066 |                                                                    |        |
| Ionone                            | 2879s; 7312i     |                                                                         |          |                                                                    |        |
| Glycerin                          | 3291s; 14058i    |                                                                         |          |                                                                    |        |
| 4-Vinylphenol                     | 184321s; 282395i |                                                                         |          |                                                                    |        |
| Dibenz[b,d]cycloheptane           | 32346s; 3205i    |                                                                         |          |                                                                    |        |
| Resorcinol                        | 6953s; 53343i    |                                                                         |          |                                                                    |        |
|                                   | 1811705s; 34168  |                                                                         |          |                                                                    |        |

s-ssp. *sativa*; i- ssp. *indica*; THC-Tetrahydrocannabinol; CBD-Cannabidiol.

**Table S3:** Zeta potential, hydrodynamic diameter and dry size of nanoparticles synthesized using *Cannabis sativa* ssp. *sativa* (Fe NP-S) and *Cannabis sativa* ssp. *indica* (Fe NP-I)

| Sample | Hydrodynamic diameter (nm) | Zeta potential (mV) | Dry size (nm) |
|--------|----------------------------|---------------------|---------------|
|        |                            |                     |               |

|         |            |              |            |
|---------|------------|--------------|------------|
| Fe NP-S | 1739 ± 146 | +4.3 ± 0.1   | 25.4 ± 3.5 |
| Fe NP-I | 164 ± 47   | - 27.2 ± 0.2 | 9.7 ± 2.1  |

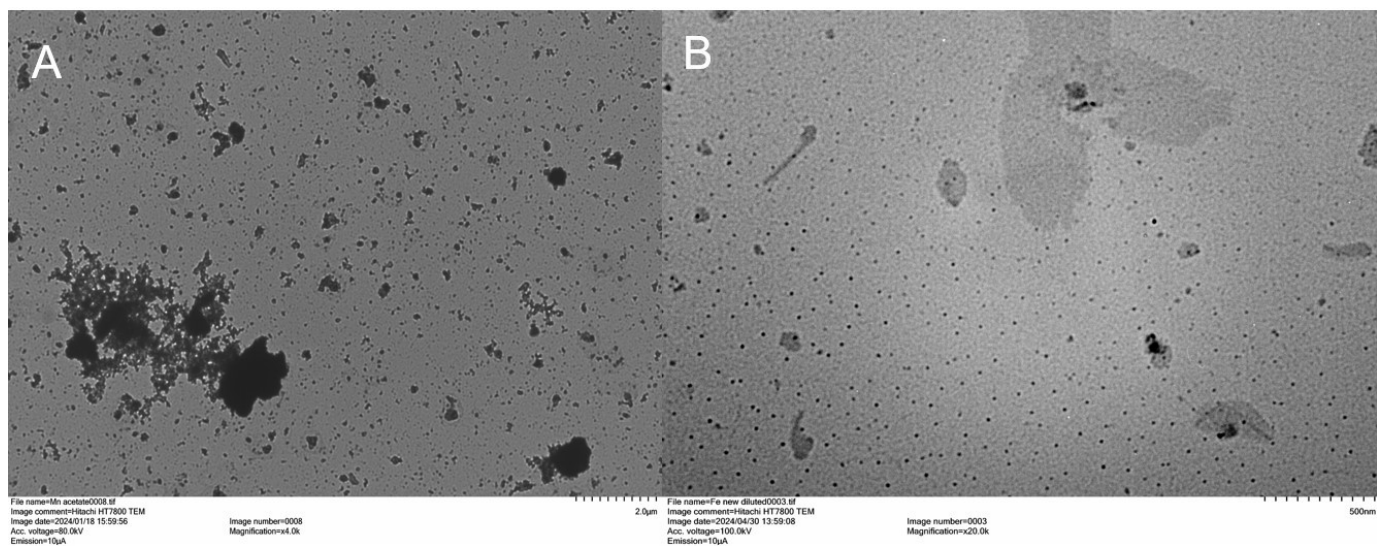

**Figure S1.** Transmission electron micrographs of iron nanoparticles. A-Iron nanoparticles synthesized from *Cannabis sativa* ssp. *sativa*; B- Iron nanoparticles synthesized from *Cannabis sativa* ssp. *indica*

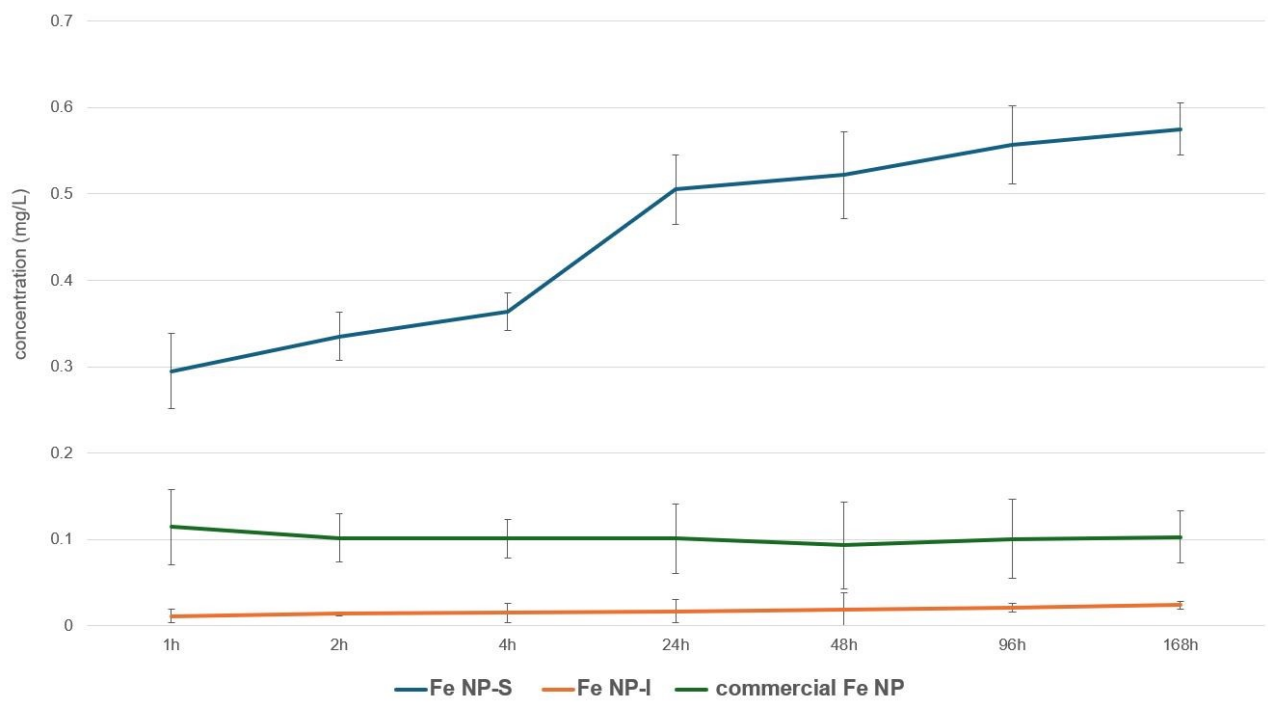

**Figure S2.** Dissolution analysis of iron nanoparticles. Fe NP-S - Iron nanoparticles synthesized from *Cannabis sativa* ssp. *sativa*; Fe NP-I- Iron nanoparticles synthesized from *Cannabis sativa* ssp. *Indica*; Fe commercial NP - commercially available iron oxide nanoparticles

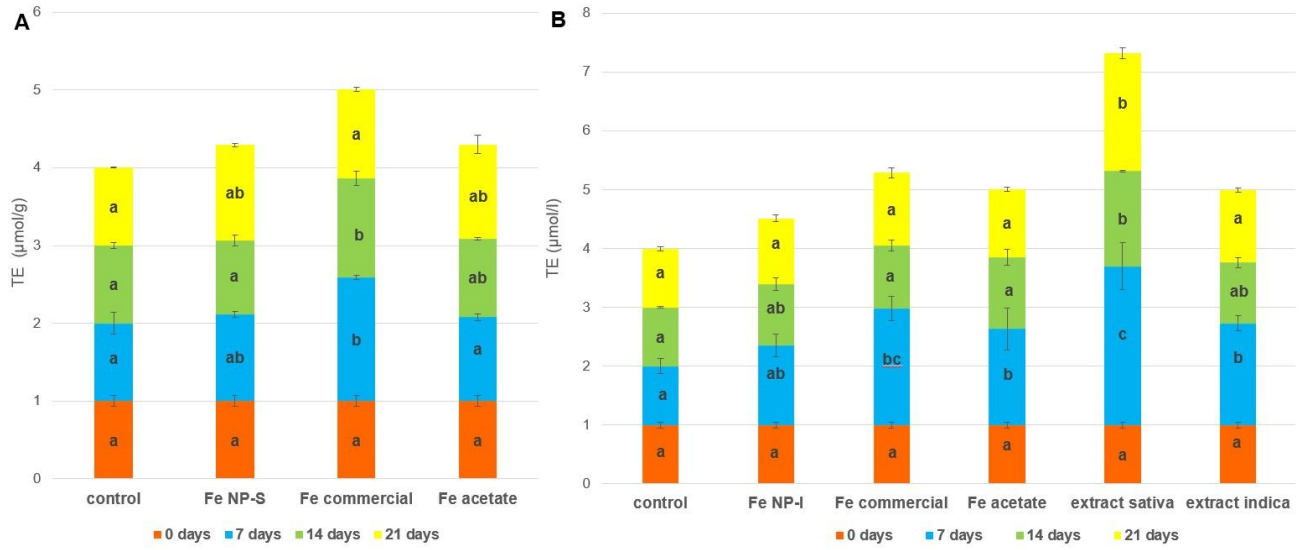

**Figure S3.** Changes in normalized antioxidant content in soybean exposed to Fe NPs (as detected by ABTS assay). A- Experiment with iron nanoparticles synthesized from *Cannabis sativa* ssp. *sativa* extract; B- Experiment with iron nanoparticle synthesized from *Cannabis sativa* ssp. *indica* extract. Fe NP-S - Fe nanoparticles synthesized from *Cannabis sativa* ssp. *sativa* extract; Fe commercial- commercial Fe<sub>2</sub>O<sub>3</sub> nanoparticles; extract sativa- *Cannabis sativa* ssp. *sativa* extract; extract indica- *Cannabis sativa* ssp. *indica* extract. Different letters indicate that samples were statistically different (as determined by Tukey test at p < 0.05).

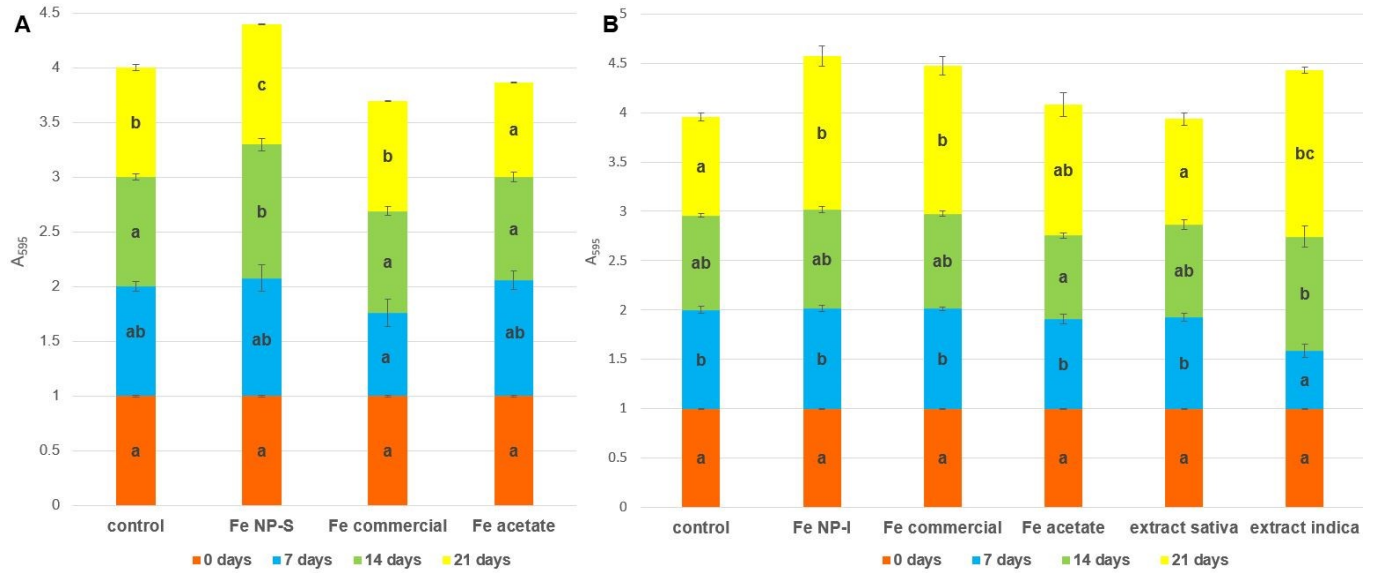

**Figure S4.** Changes in normalized plant cell viability in soybean exposed to Fe NPs. A- Experiment with iron nanoparticles synthesized from *Cannabis sativa* ssp. *sativa* extract; B- Experiment with iron nanoparticle synthesized from *Cannabis sativa* ssp. *indica* extract. Fe NP-S - Fe nanoparticles synthesized from *Cannabis sativa* ssp. *sativa* extract; Fe commercial- commercial Fe<sub>2</sub>O<sub>3</sub> nanoparticles; extract sativa- *Cannabis sativa* ssp. *sativa* extract; extract indica- *Cannabis sativa* ssp. *indica* extract. Different letters indicate that samples were statistically different (as determined by Tukey test at  $p < 0.05$ ).



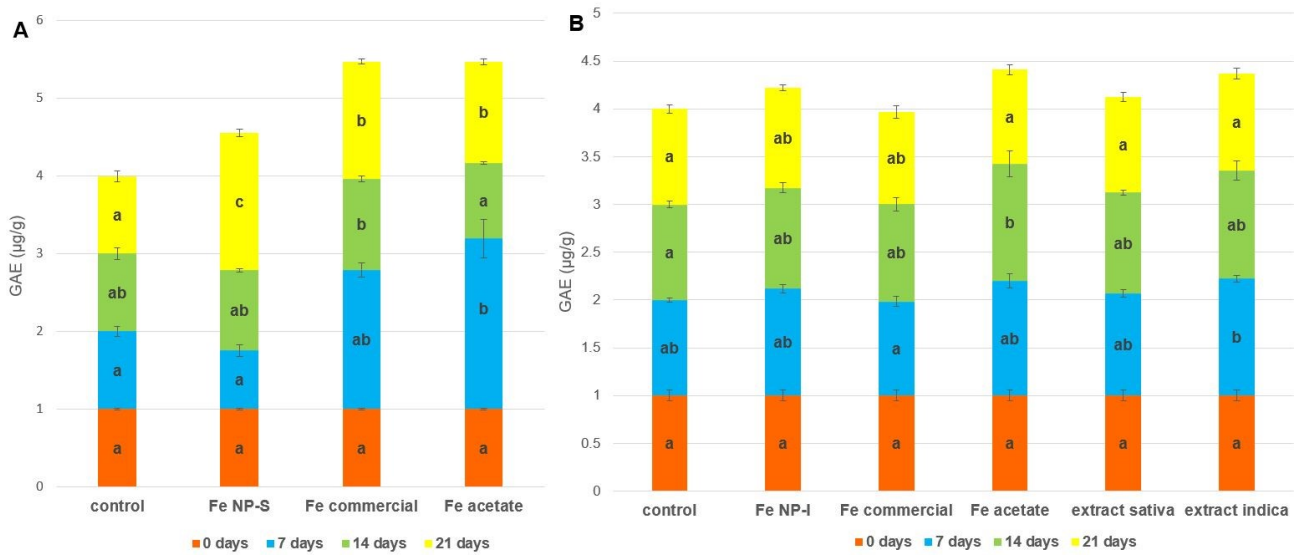

**Figure S5.** Changes in normalized total polyphenolic content in soybean exposed to Fe NPs. A- Experiment with iron nanoparticles synthesized from *Cannabis sativa* ssp. *sativa* extract; B- Experiment with iron nanoparticle synthesized from *Cannabis sativa* ssp. *indica* extract. Fe NP-S - Fe nanoparticles synthesized from *Cannabis sativa* ssp. *sativa* extract; Fe commercial- commercial Fe<sub>2</sub>O<sub>3</sub> nanoparticles; Fe NP-I - Fe nanoparticles synthesized from *Cannabis sativa* ssp. *indica* extract; extract sativa- *Cannabis sativa* ssp. *sativa* extract; extract indica- *Cannabis sativa* ssp. *indica* extract. Different letters indicate that samples were statistically different (as determined by Tukey test at p < 0.05).

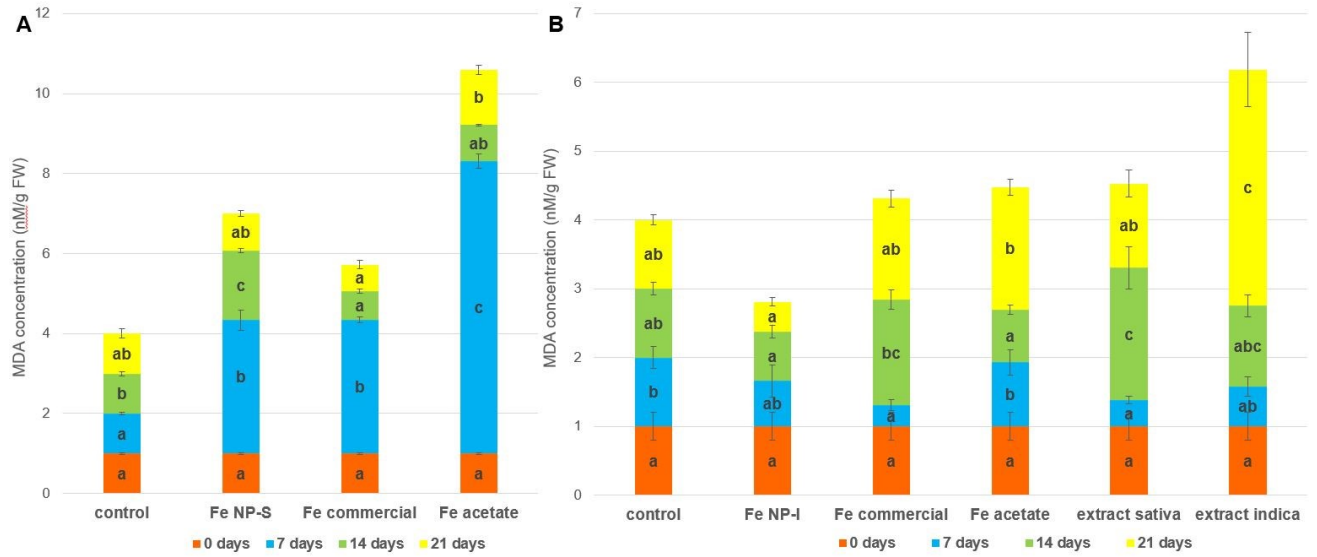

**Figure S6.** Changes in normalized malondialdehyde content in soybean exposed to Fe NPs. A- Experiment with iron nanoparticles synthesized from *Cannabis sativa* ssp. *sativa* extract; B- Experiment with iron nanoparticle synthesized from *Cannabis sativa* ssp. *indica* extract. Fe NP-S - Fe nanoparticles synthesized from *Cannabis sativa* ssp. *sativa* extract; Fe commercial- commercial Fe<sub>2</sub>O<sub>3</sub> nanoparticles; extract sativa- *Cannabis sativa* ssp. *sativa* extract; extract indica- *Cannabis sativa* ssp. *indica* extract. Different letters indicate that samples were statistically different (as determined by Tukey test at  $p < 0.05$ ).

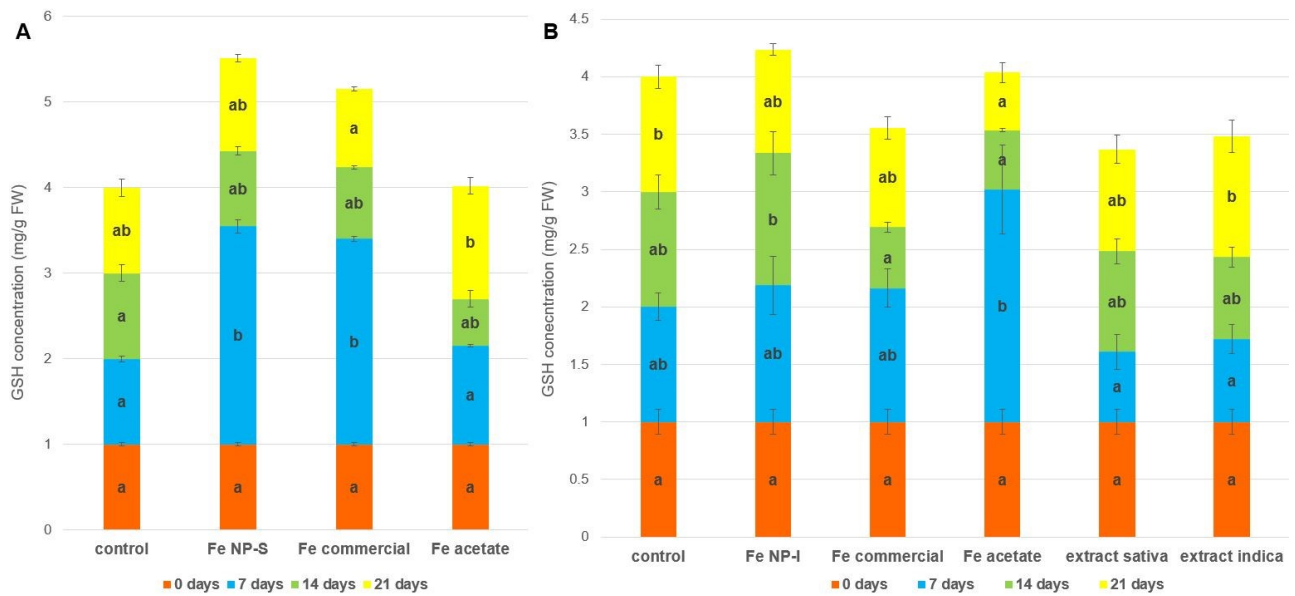

**Figure S7.** Changes in normalized glutathione content in soybean exposed to Fe NPs. A- Experiment with iron nanoparticles synthesized from *Cannabis sativa* ssp. *sativa* extract; B- Experiment with iron nanoparticle synthesized from *Cannabis sativa* ssp. *indica* extract. Fe NP-S - Fe nanoparticles synthesized from *Cannabis sativa* ssp. *sativa* extract; Fe commercial- commercial Fe<sub>2</sub>O<sub>3</sub> nanoparticles; extract sativa- *Cannabis sativa* ssp. *sativa* extract; extract indica- *Cannabis sativa* ssp. *indica* extract. Different letters indicate that samples were statistically different (as determined by Tukey test at  $p < 0.05$ ).

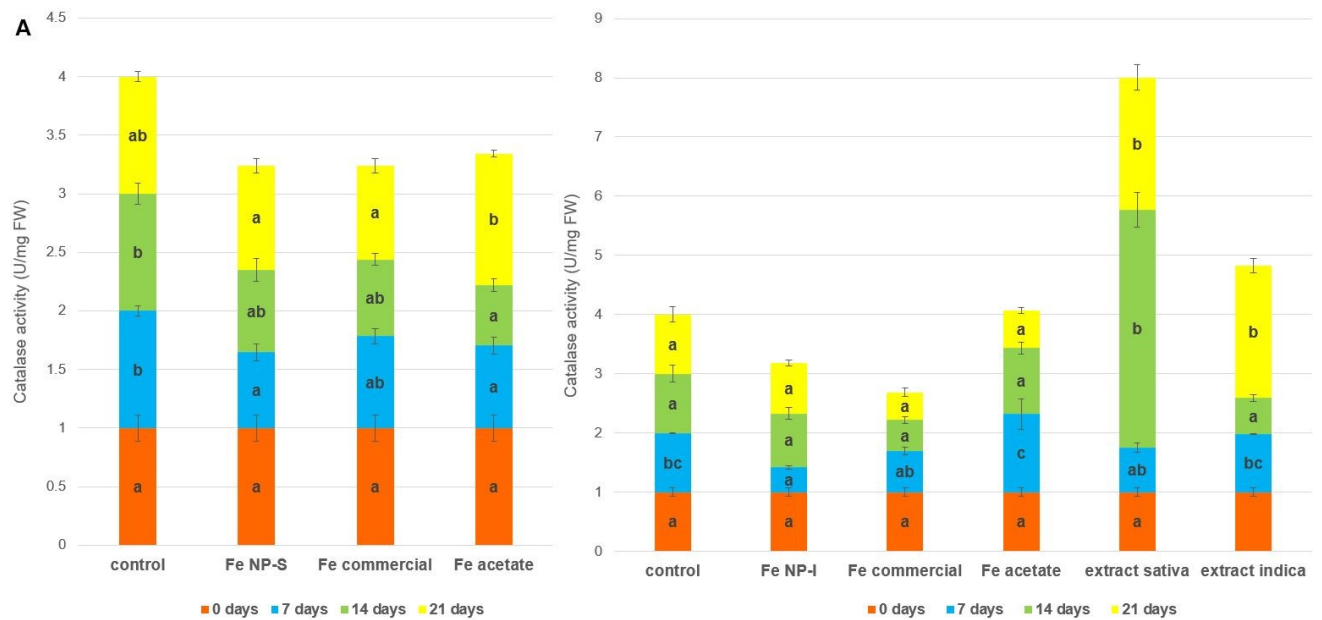

**Figure S8.** Changes in normalized catalase activity in soybean exposed to Fe NPs. A- Experiment with iron nanoparticles synthesized from *Cannabis sativa* ssp. *sativa* extract; B- Experiment with iron nanoparticle synthesized from *Cannabis sativa* ssp. *indica* extract. Fe NP-S - Fe nanoparticles synthesized from *Cannabis sativa* ssp. *sativa* extract; Fe commercial- commercial Fe<sub>2</sub>O<sub>3</sub> nanoparticles; extract sativa- *Cannabis sativa* ssp. *sativa* extract; extract indica- *Cannabis sativa* ssp. *indica* extract. Different letters indicate that samples were statistically different (as determined by Tukey test at p < 0.05).

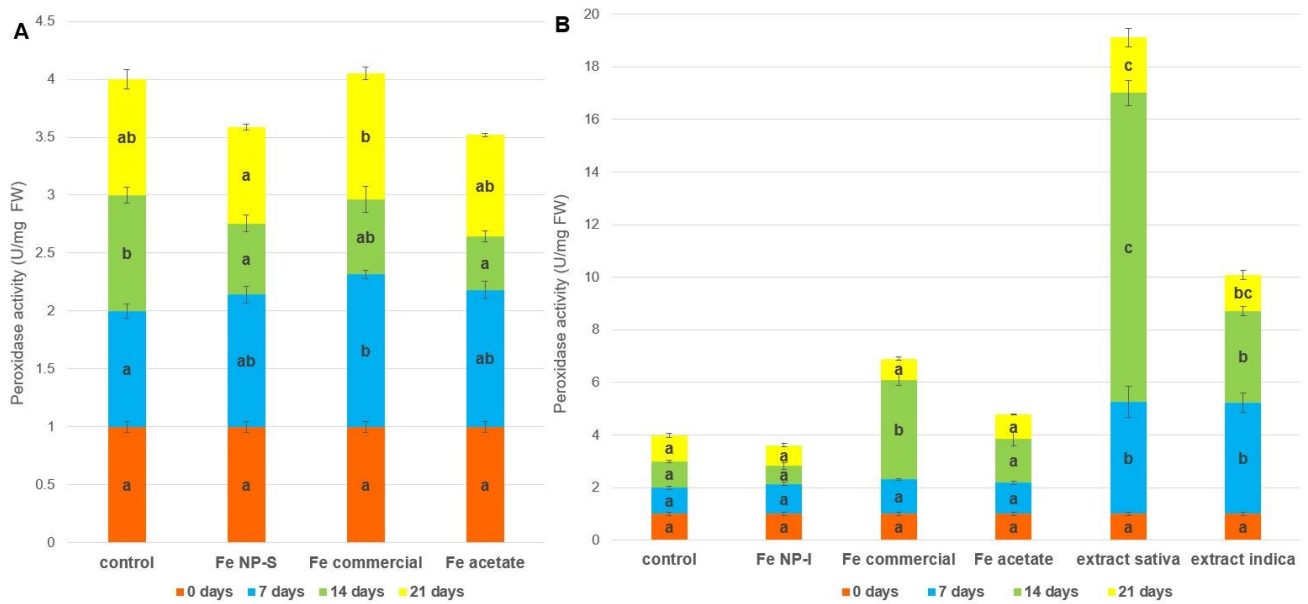

**Figure S9.** Changes in normalized peroxidase activity in soybean exposed to Fe NPs. A- Experiment with iron nanoparticles synthesized from *Cannabis sativa* ssp. *sativa* extract; B- Experiment with iron nanoparticle synthesized from *Cannabis sativa* ssp. *indica* extract. Fe NP-S - Fe nanoparticles synthesized from *Cannabis sativa* ssp. *sativa* extract; Fe commercial- commercial Fe<sub>2</sub>O<sub>3</sub> nanoparticles; extract sativa- *Cannabis sativa* ssp. *sativa* extract; extract indica- *Cannabis sativa* ssp. *indica* extract. Different letters indicate that samples were statistically different (as determined by Tukey test at p < 0.05).

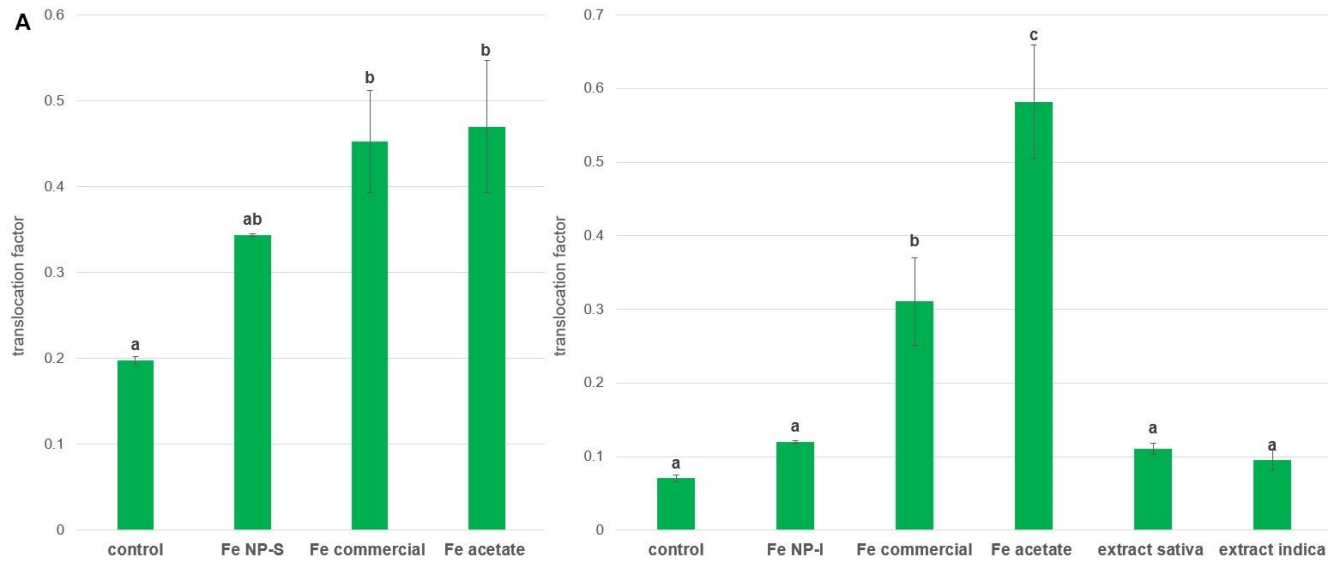

**Figure S10.** Translocation factor of Fe NPs in soybean. A- Experiment with iron nanoparticles synthesized from *Cannabis sativa* ssp. *sativa* extract; B- Experiment with iron nanoparticle synthesized from *Cannabis sativa* ssp. *indica* extract. Fe NP-S - Fe nanoparticles synthesized from *Cannabis sativa* ssp. *sativa* extract; Fe commercial- commercial Fe<sub>2</sub>O<sub>3</sub> nanoparticles; extract sativa- *Cannabis sativa* ssp. *sativa* extract; extract indica- *Cannabis sativa* ssp. *indica* extract. Different letters indicate that samples were statistically different (as determined by Tukey test at p < 0.05).
