# Supplementary figures and images for: Upcycling plant waste: iron nanoparticles synthesized from Cannabis sativa enhance biomass and antioxidative properties in soybean (Glycine max)
Source: Royal Society of Chemistry journal article supplement (doi:10.1039/d4en01018c), 2025-01-01

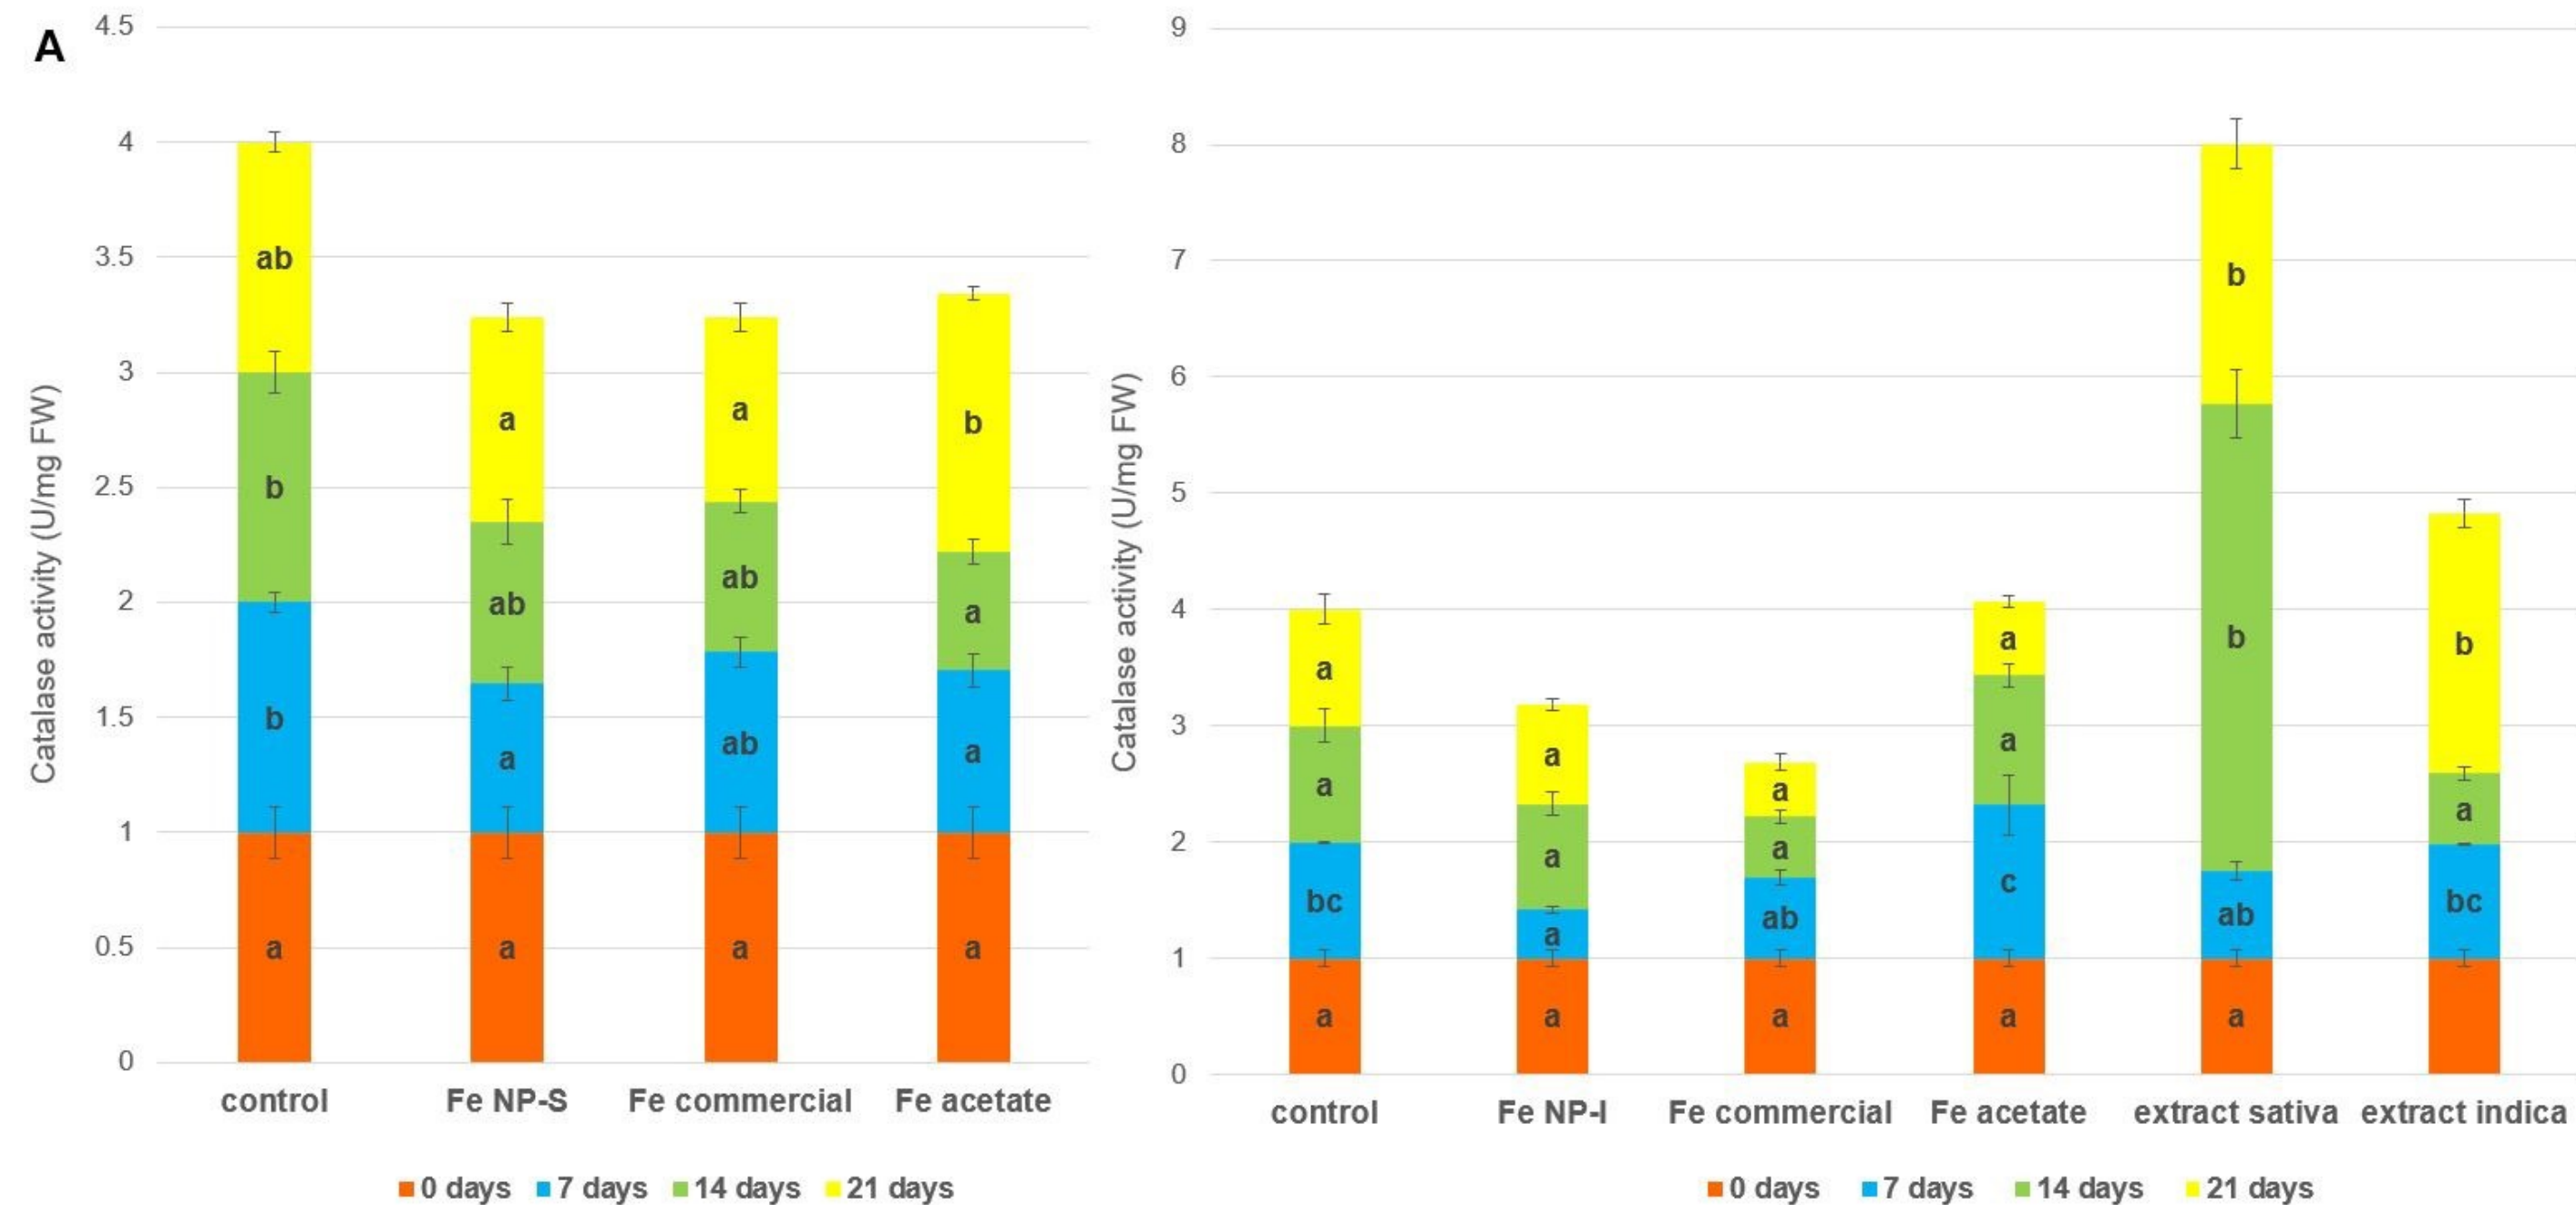

Supplement: d4en01018c10.pdf [file d4en01018c10.pdf]

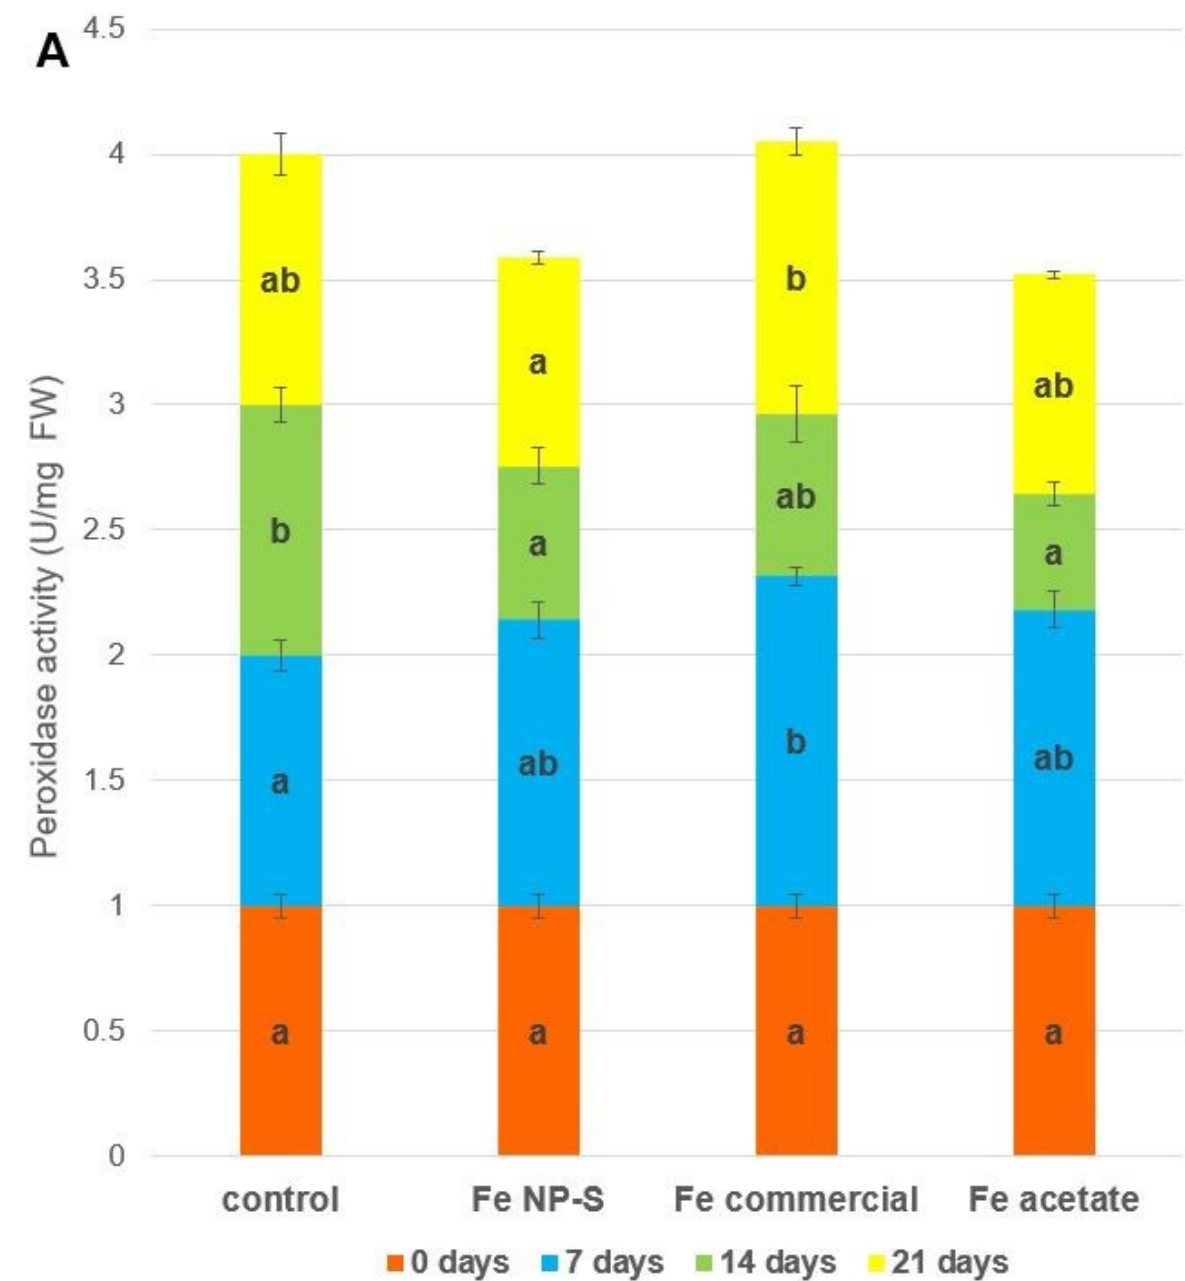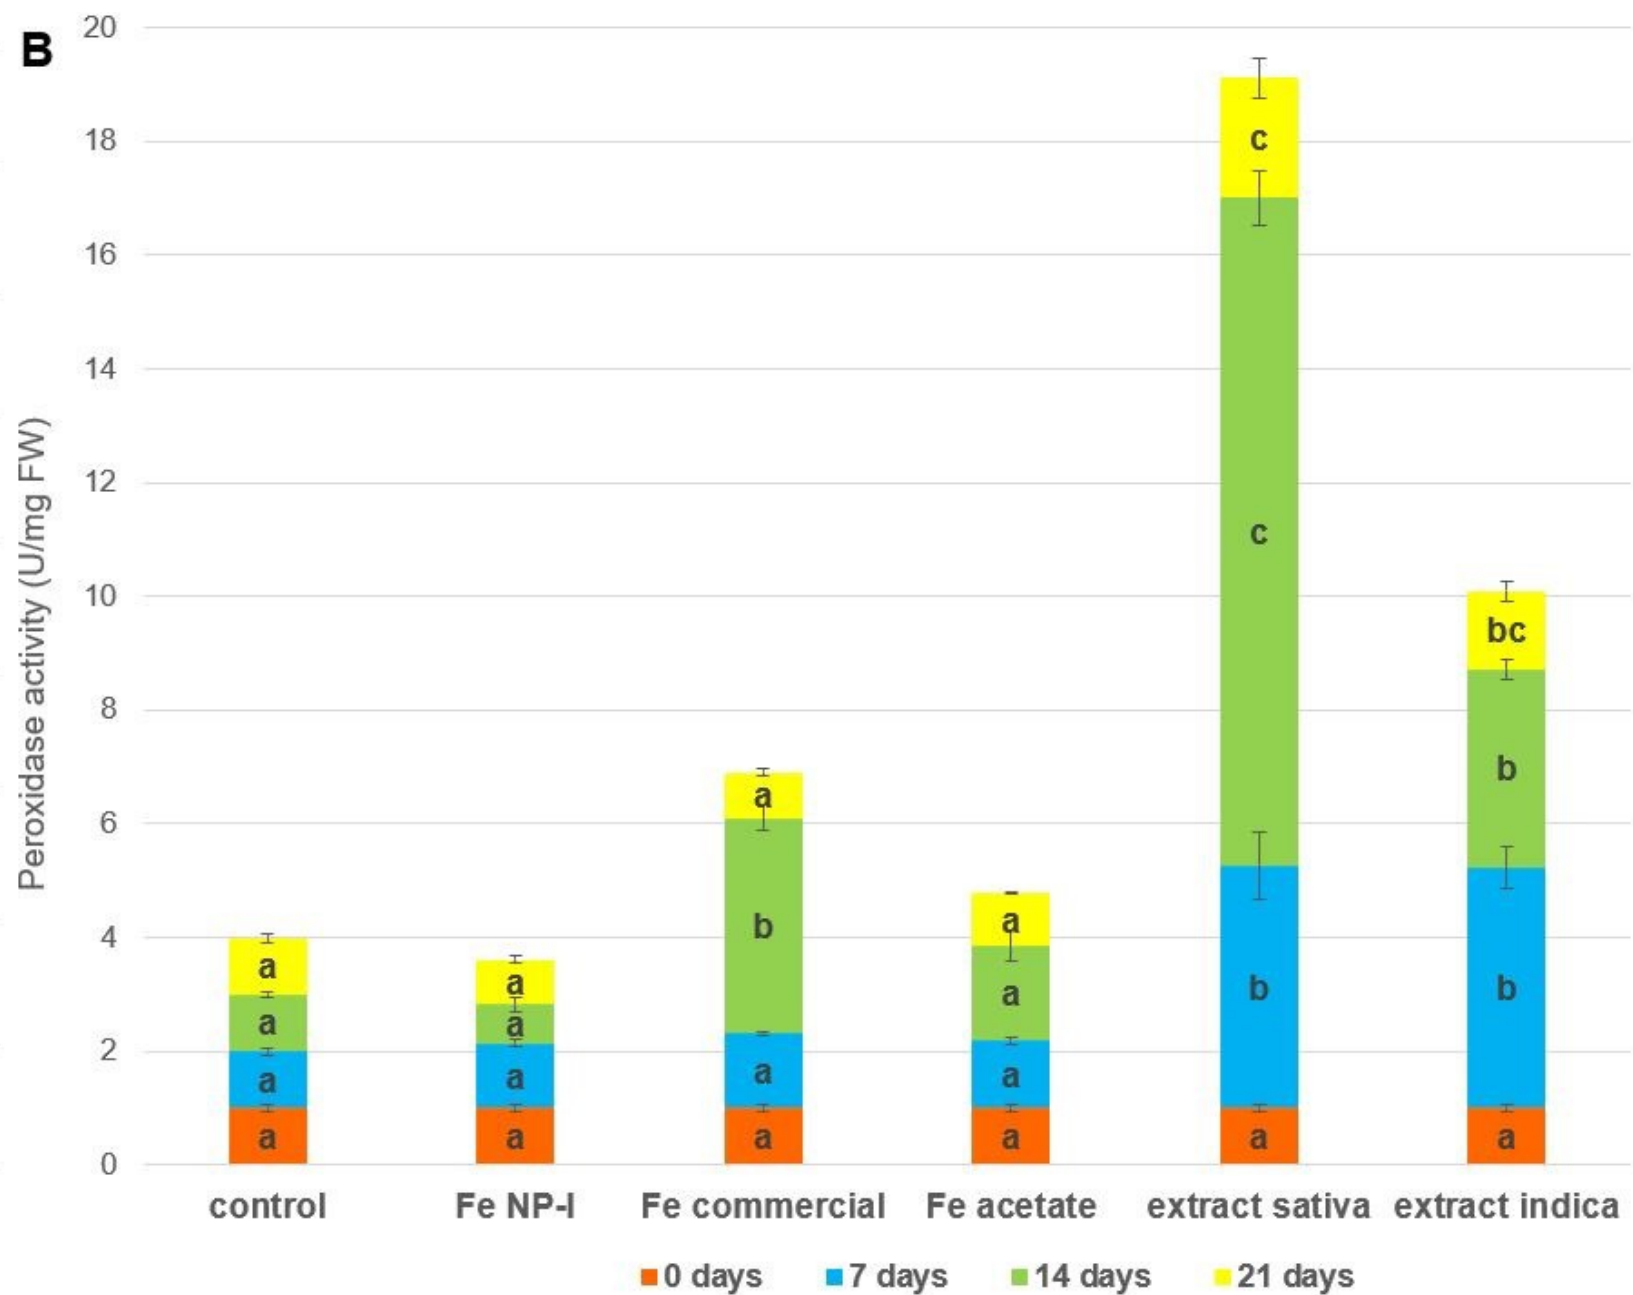

Supplement: d4en01018c11.pdf [file d4en01018c11.pdf]

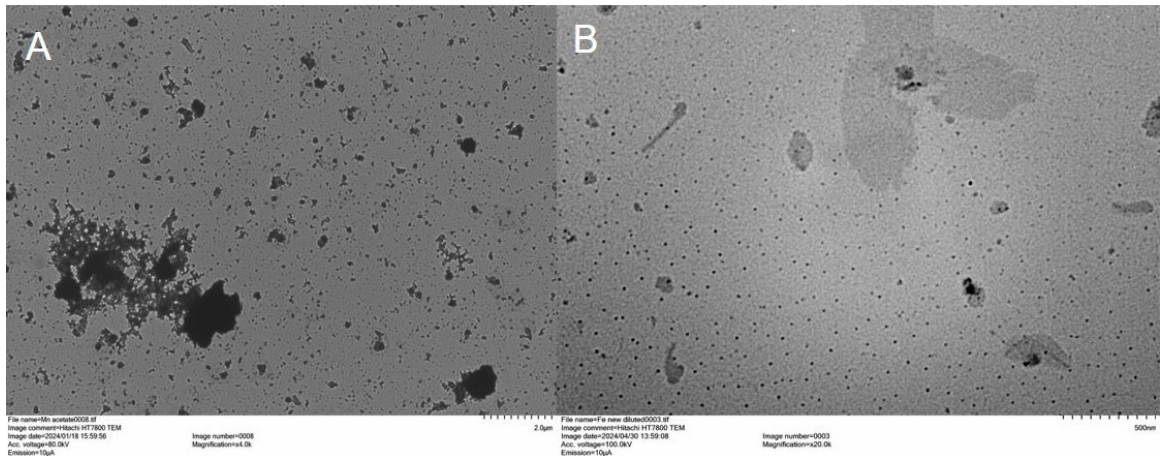

Supplement: d4en01018c2.pdf [file d4en01018c2.pdf]

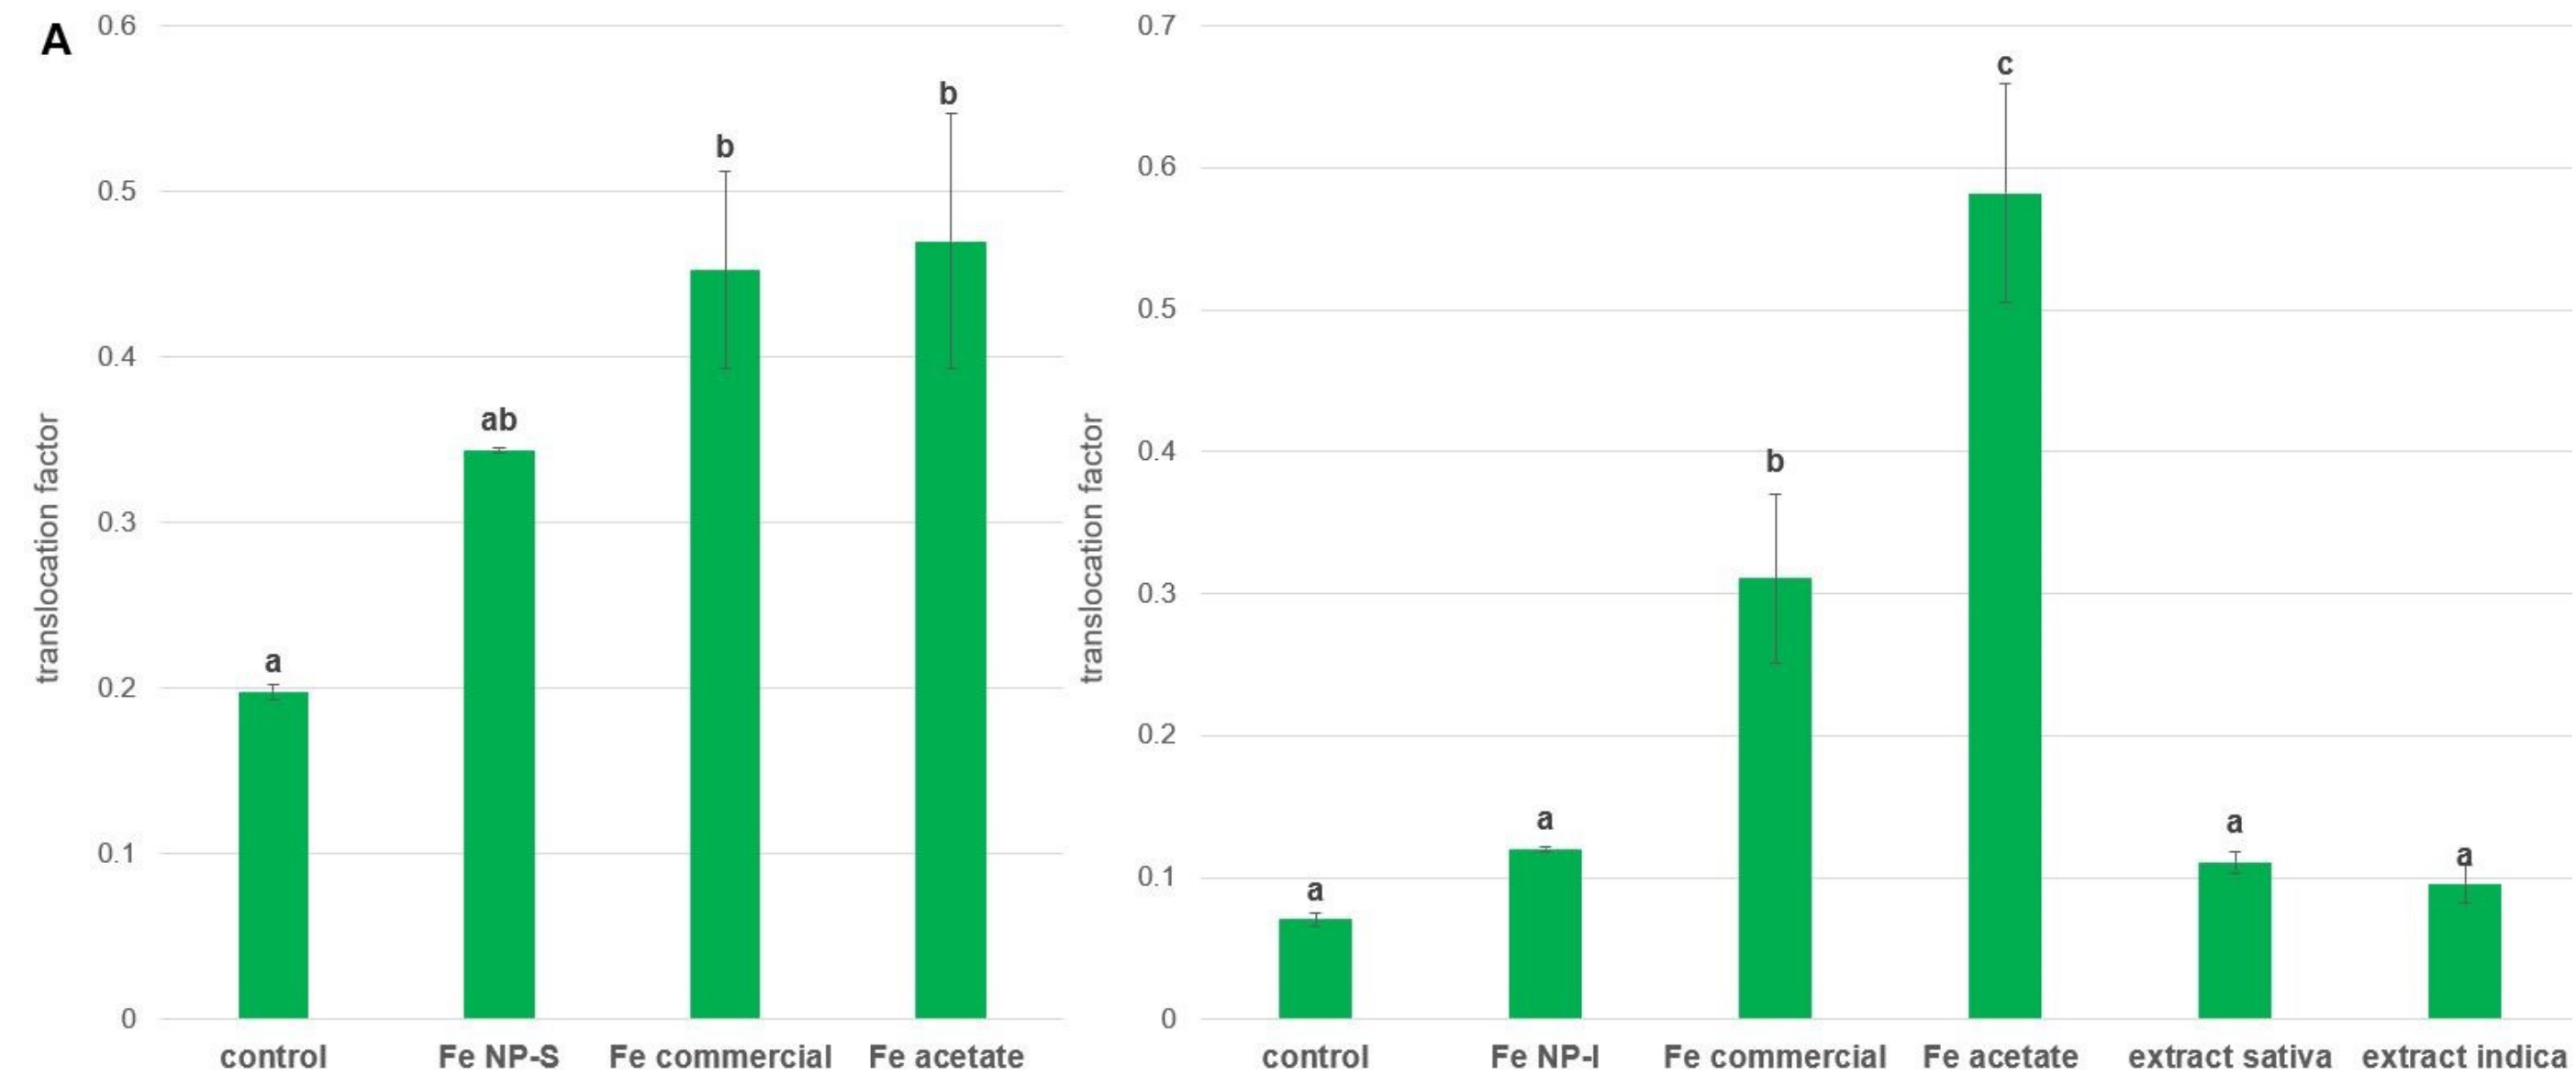

Supplement: d4en01018c3.pdf [file d4en01018c3.pdf]

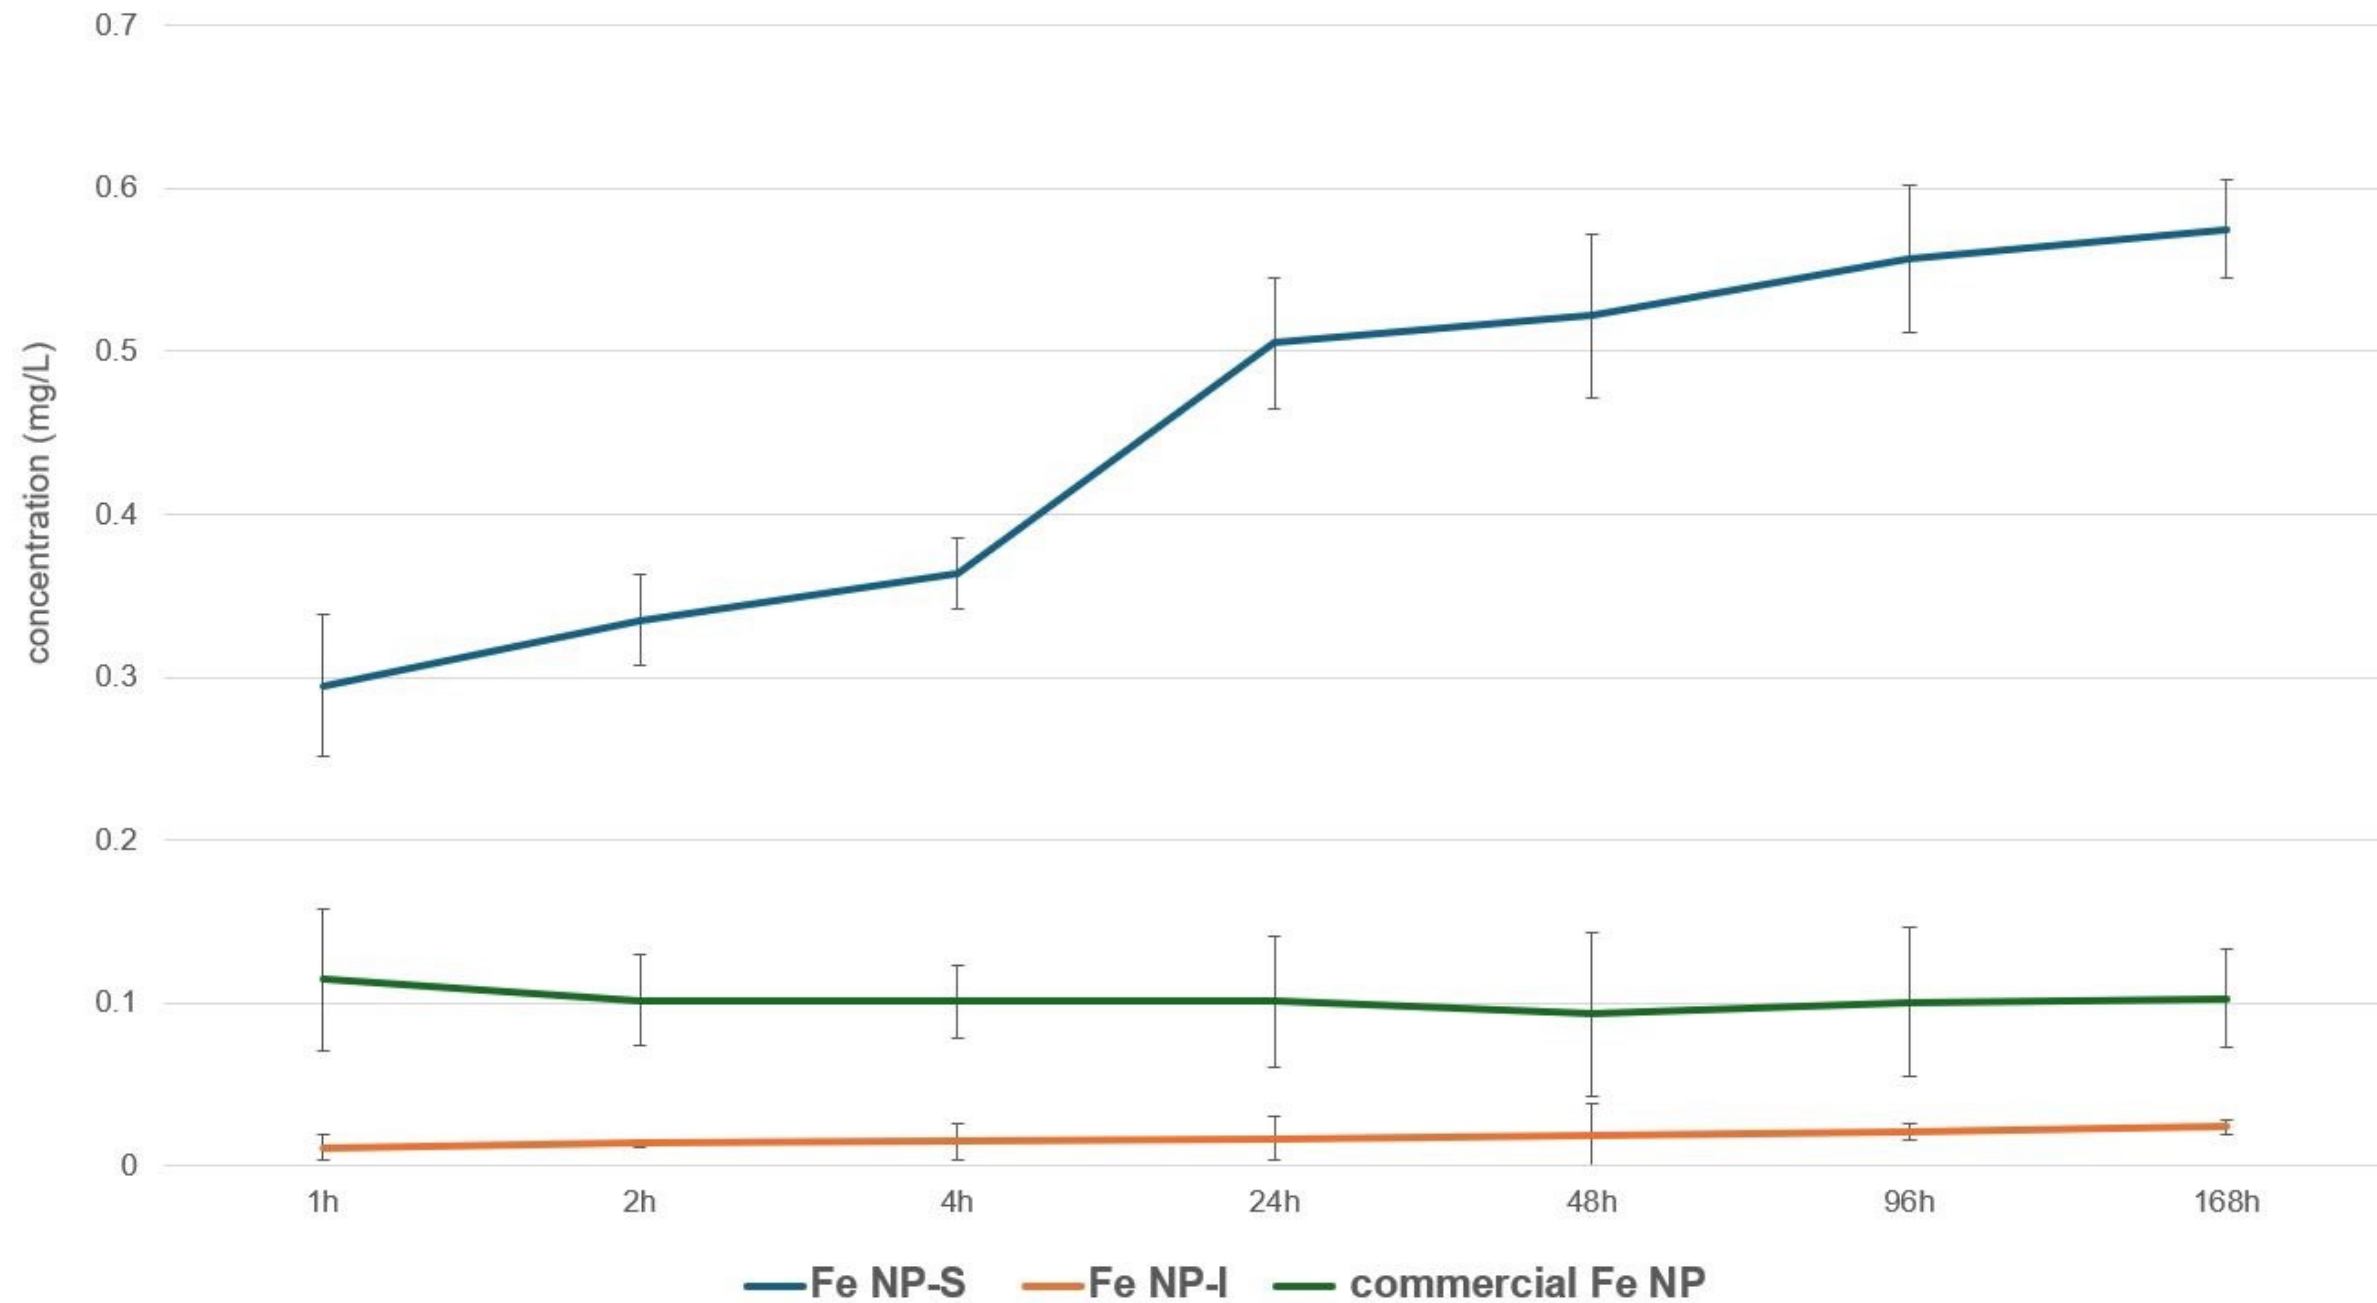

Supplement: d4en01018c4.pdf [file d4en01018c4.pdf]

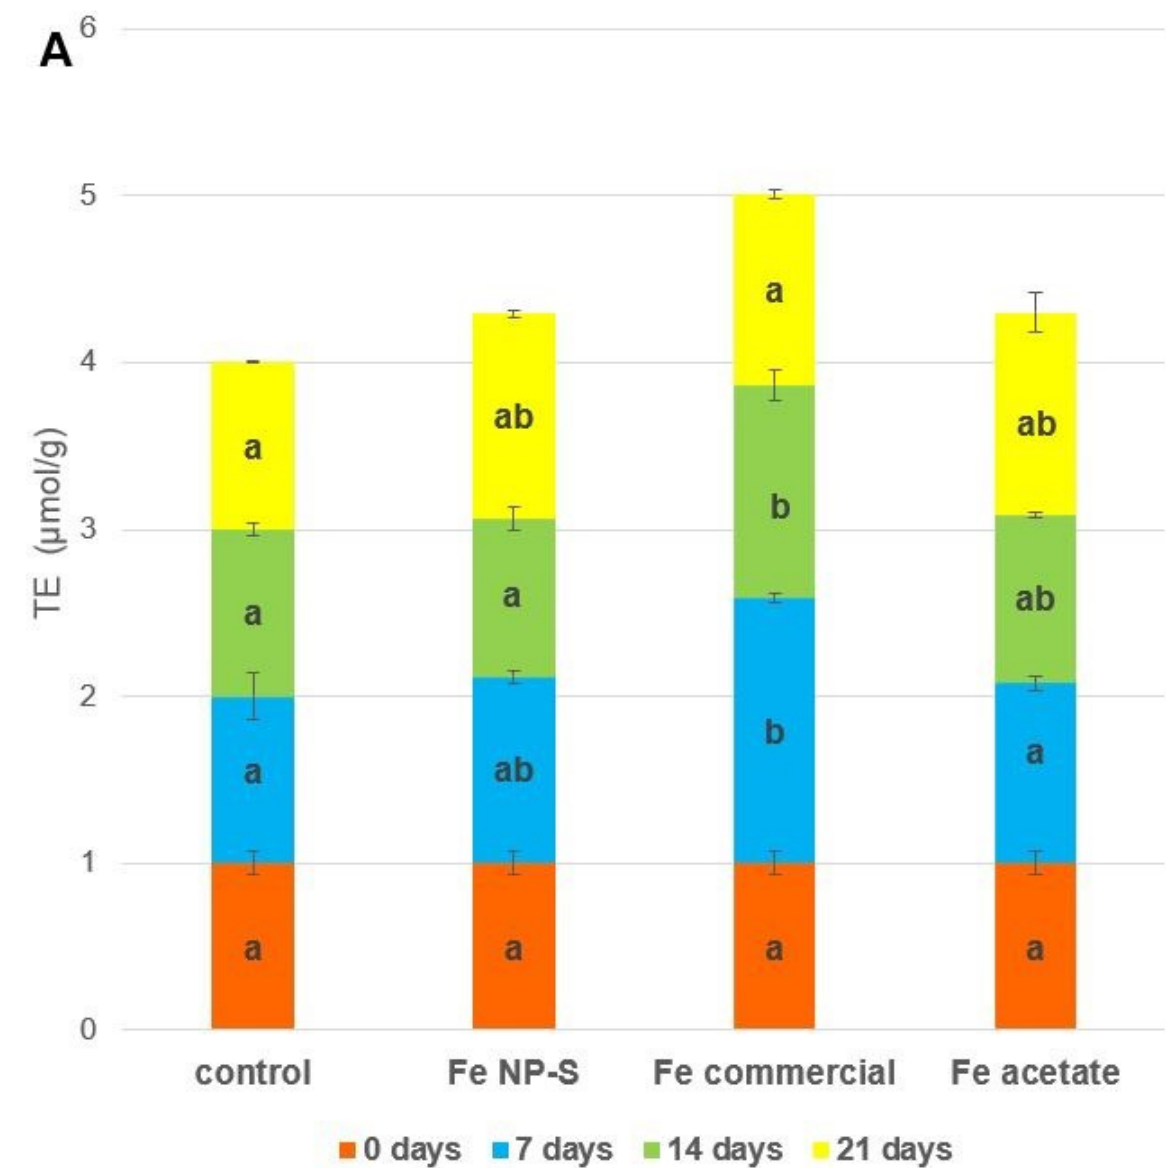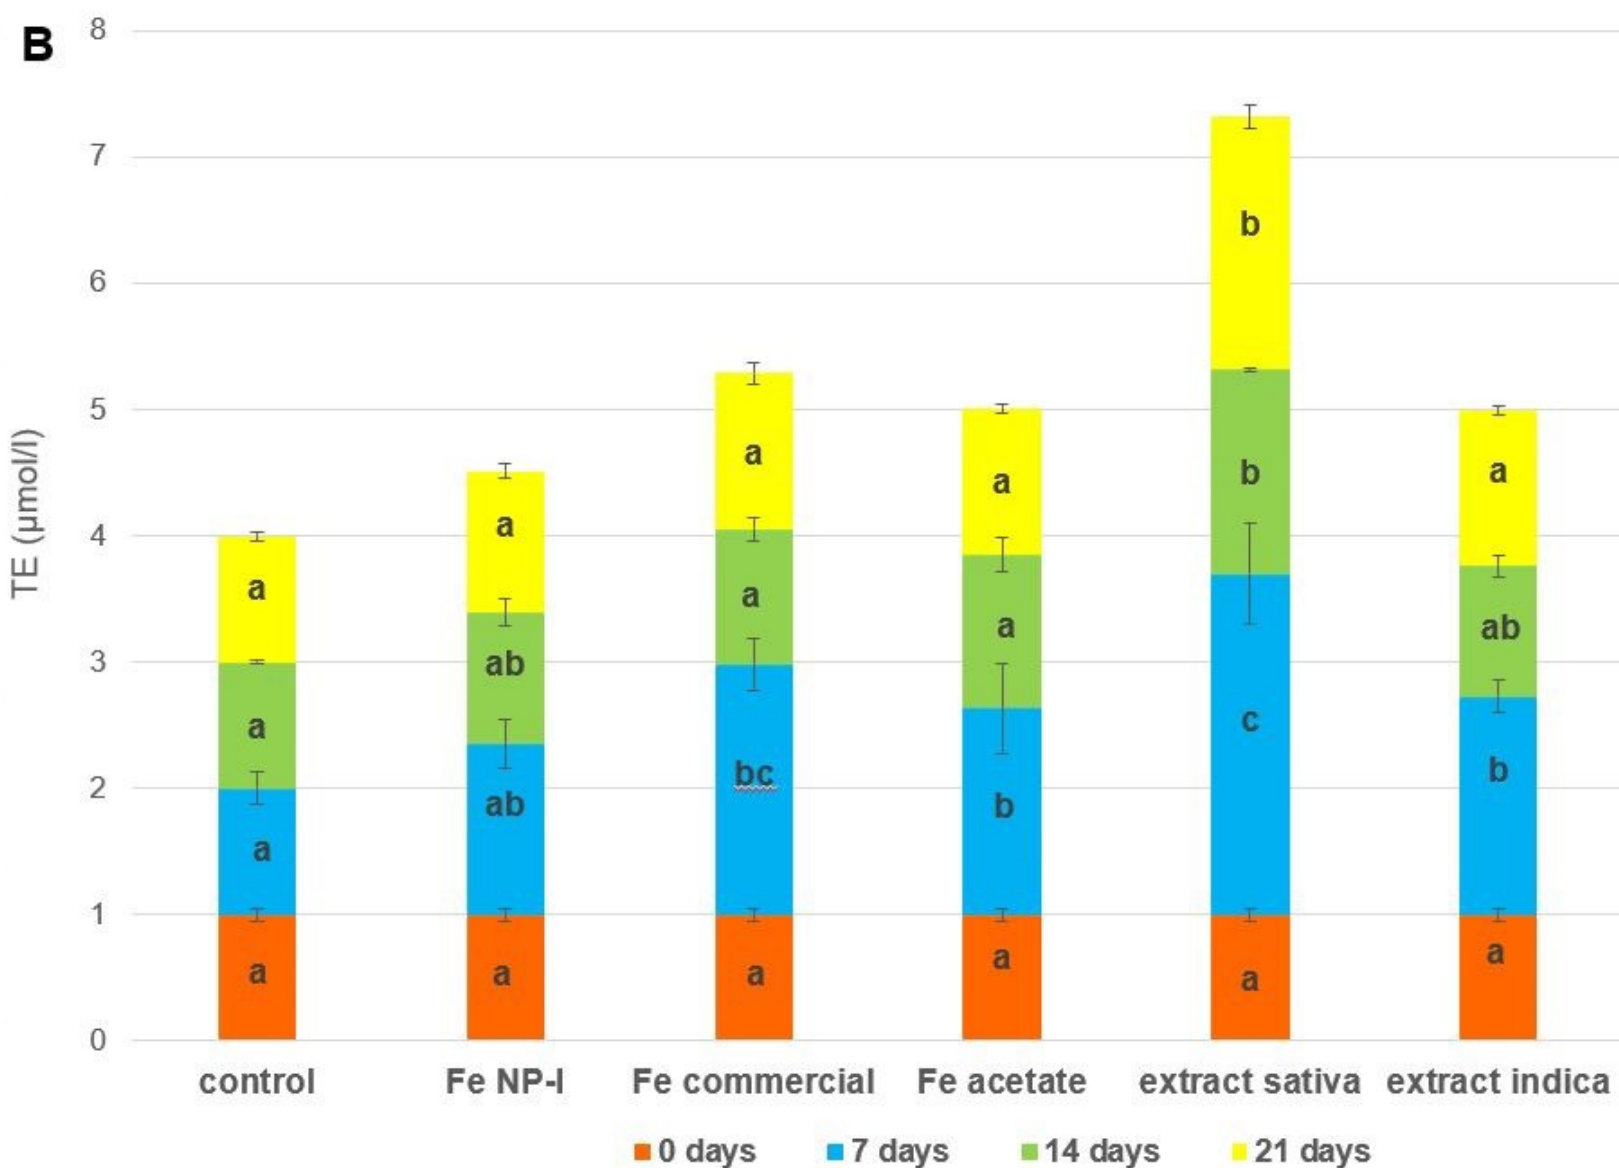

Supplement: d4en01018c5.pdf [file d4en01018c5.pdf]

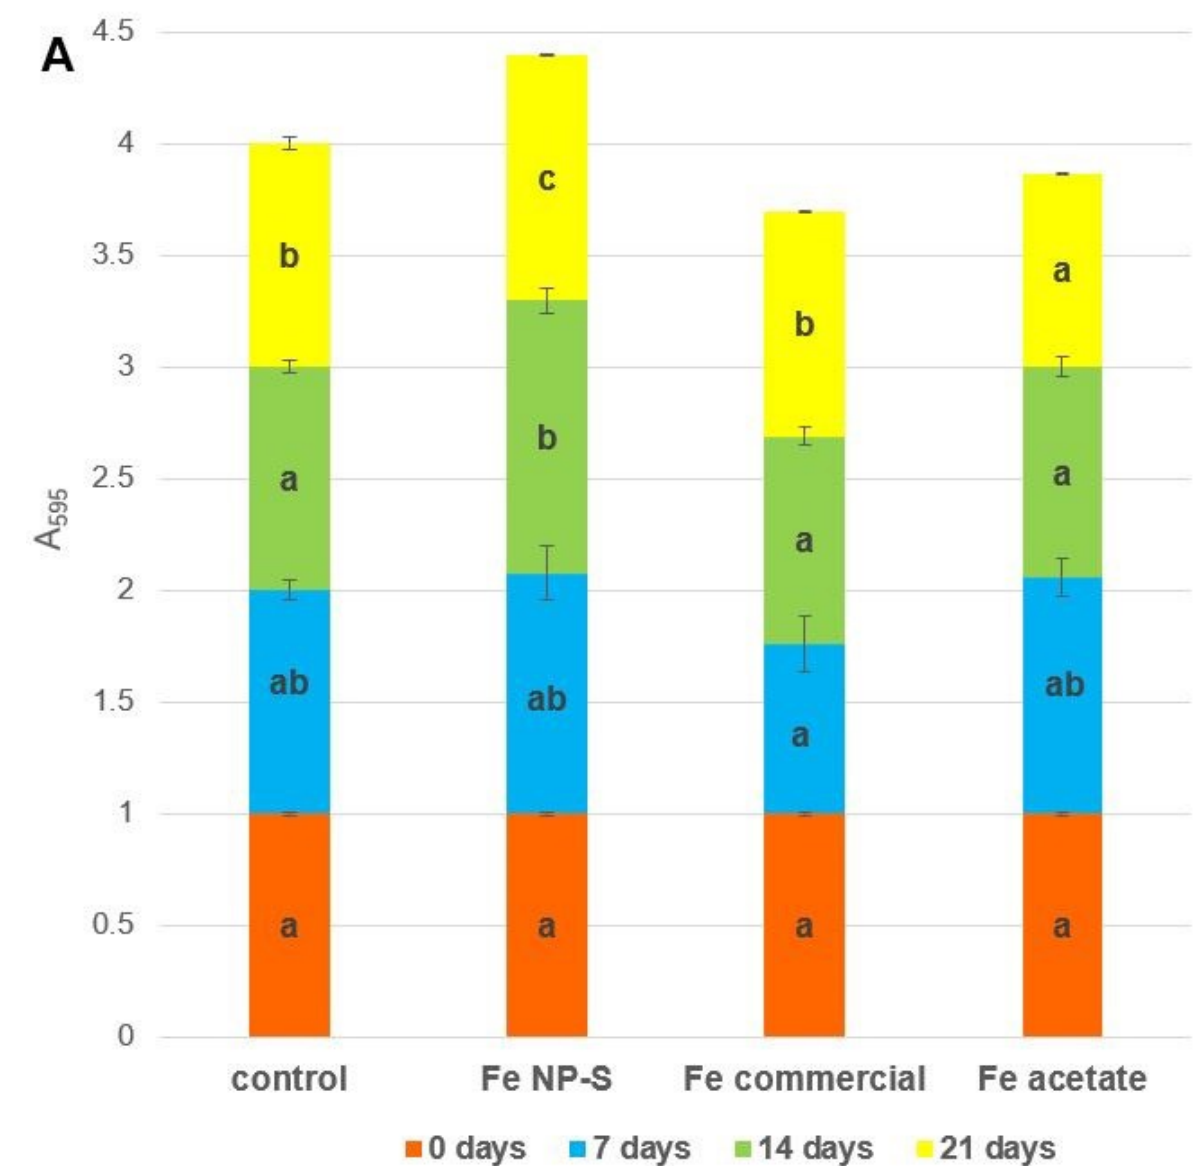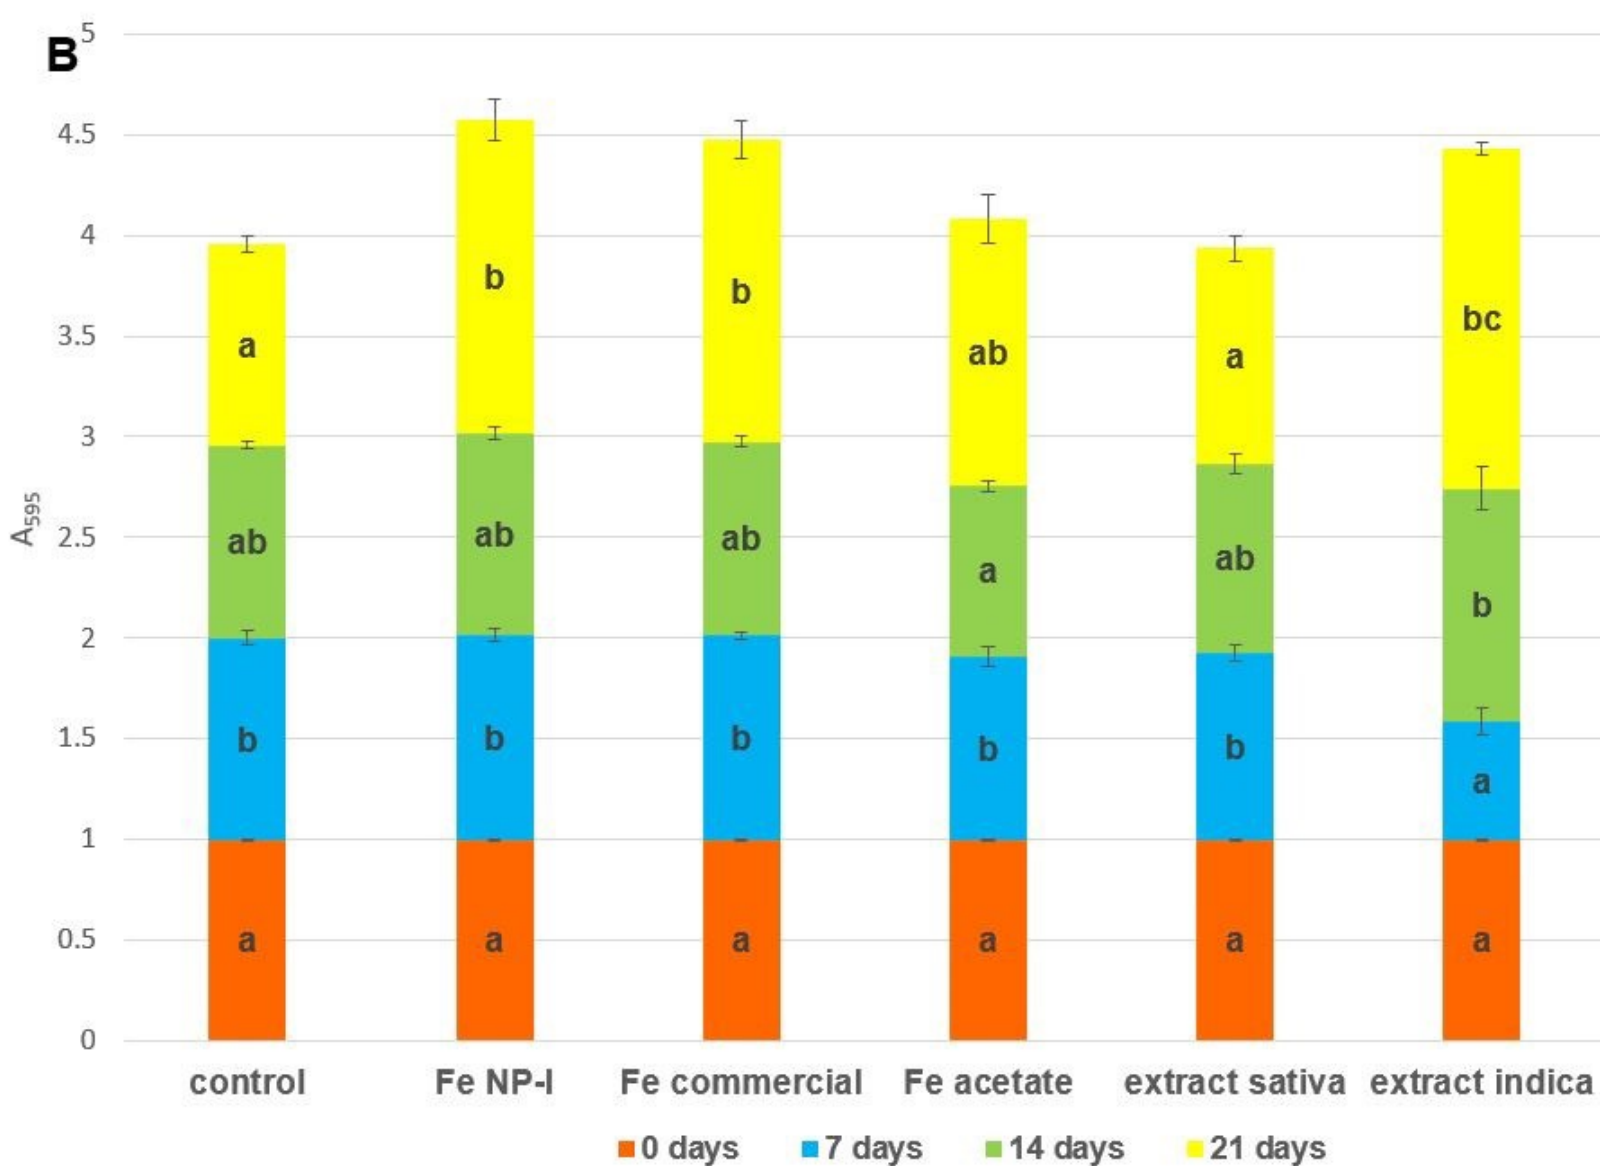

Supplement: d4en01018c6.pdf [file d4en01018c6.pdf]

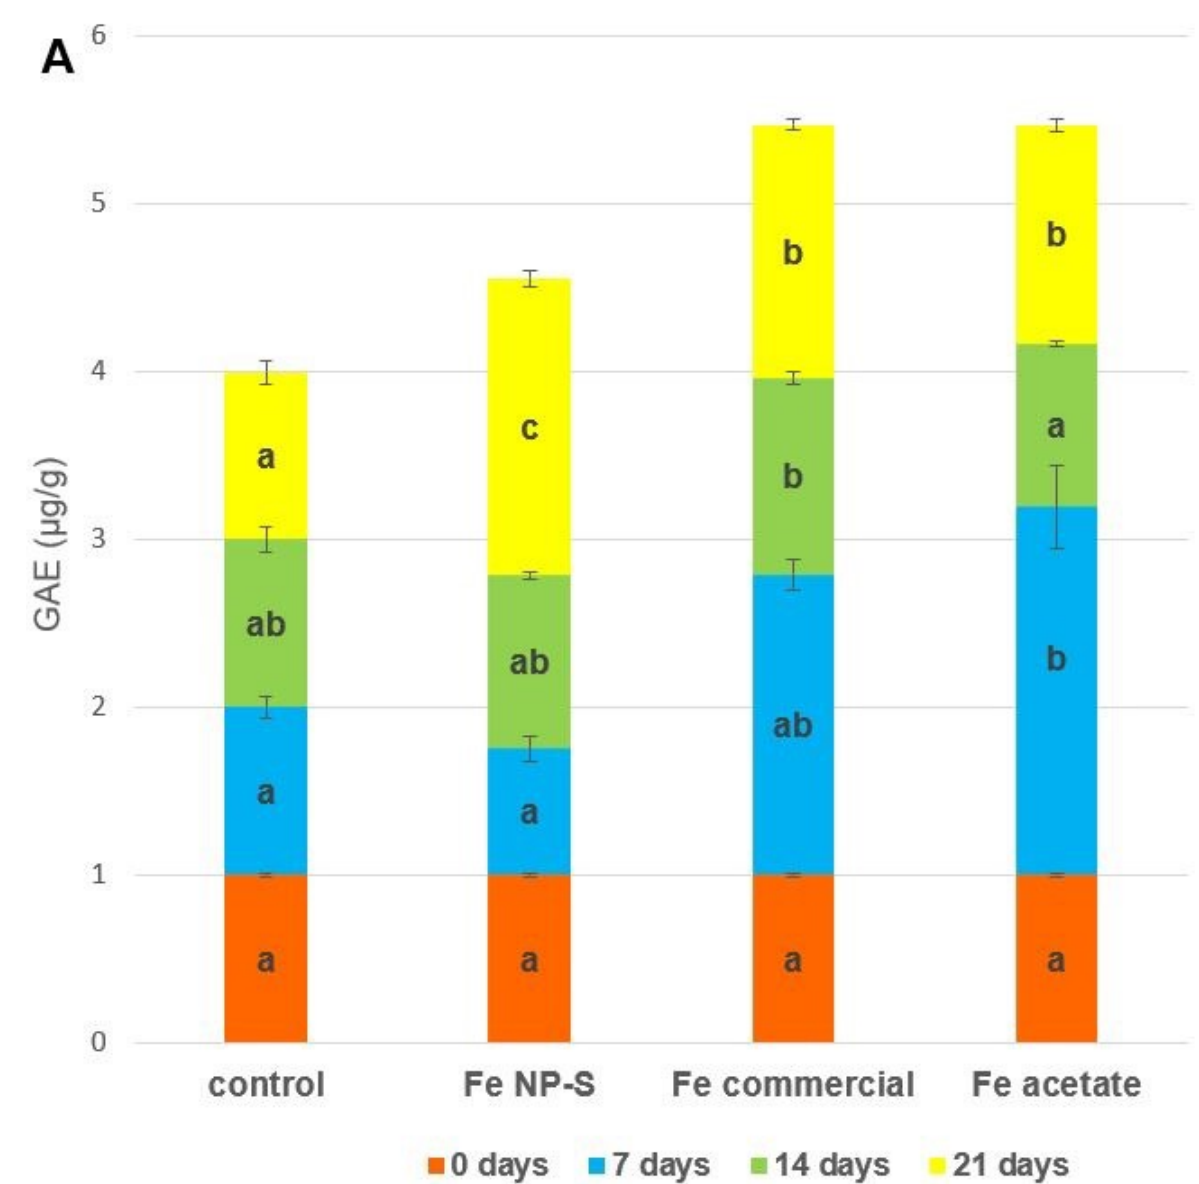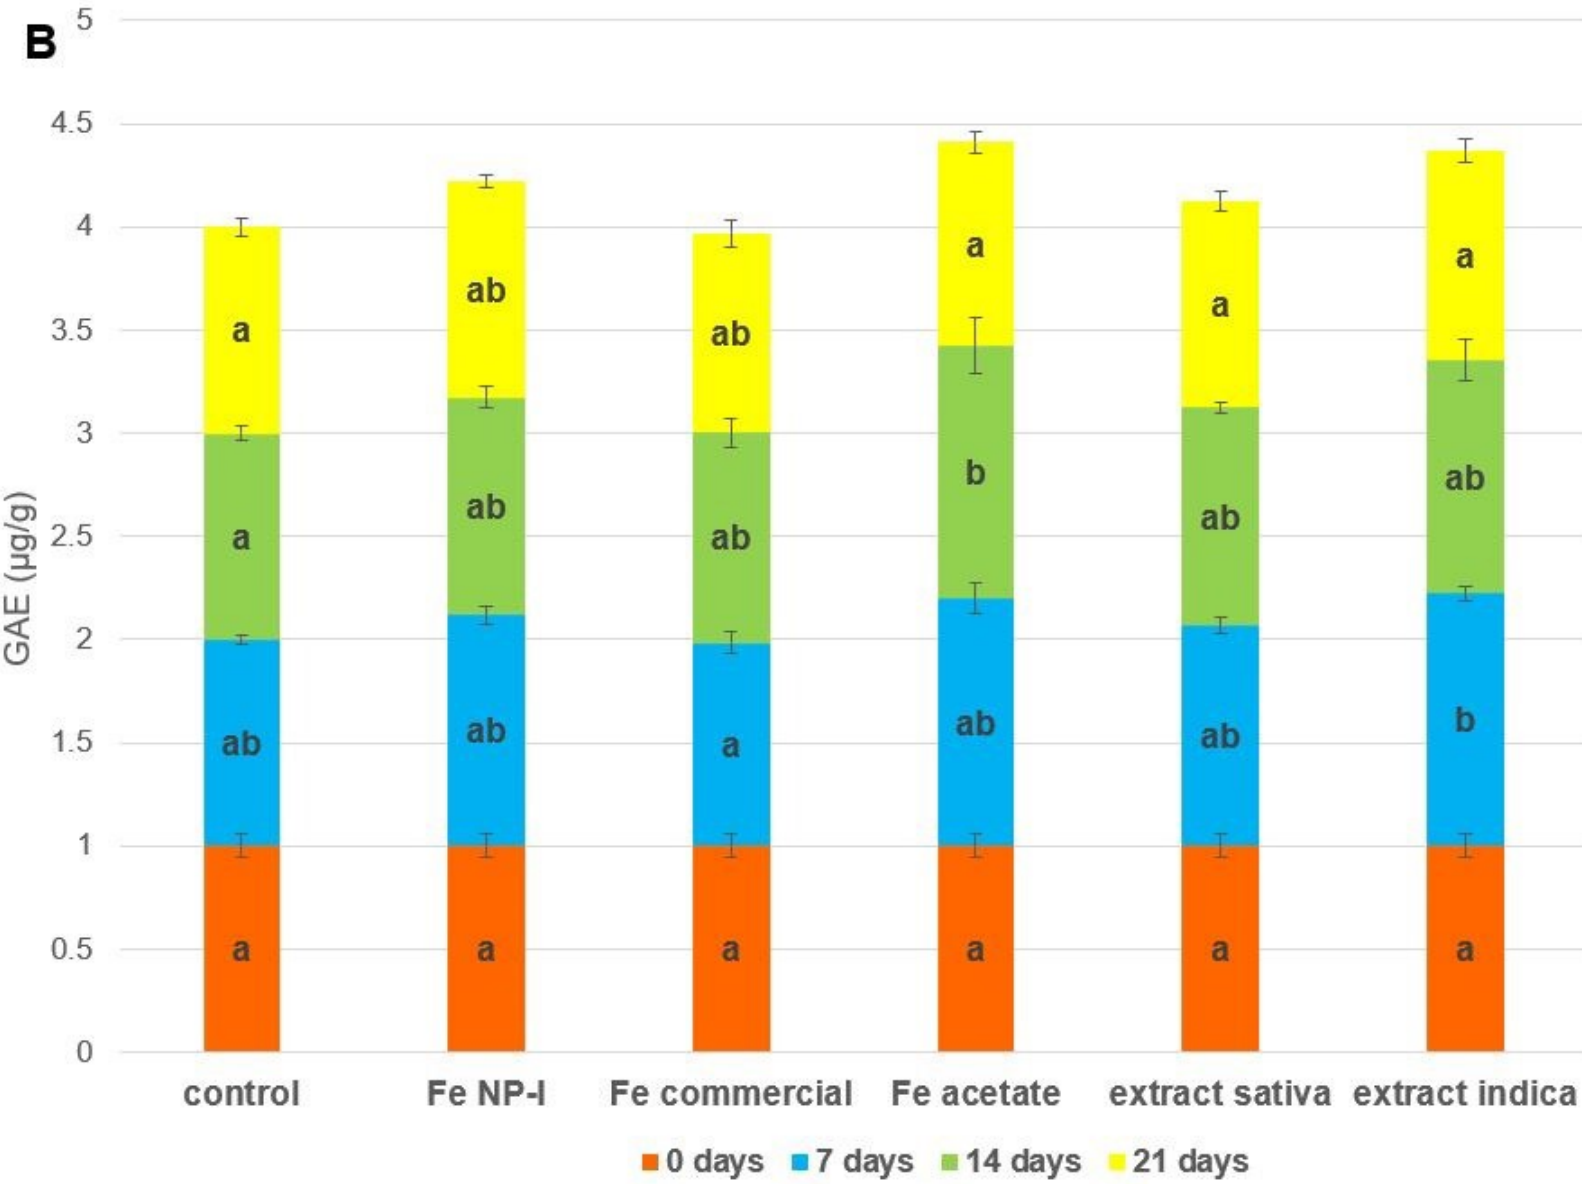

Supplement: d4en01018c7.pdf [file d4en01018c7.pdf]

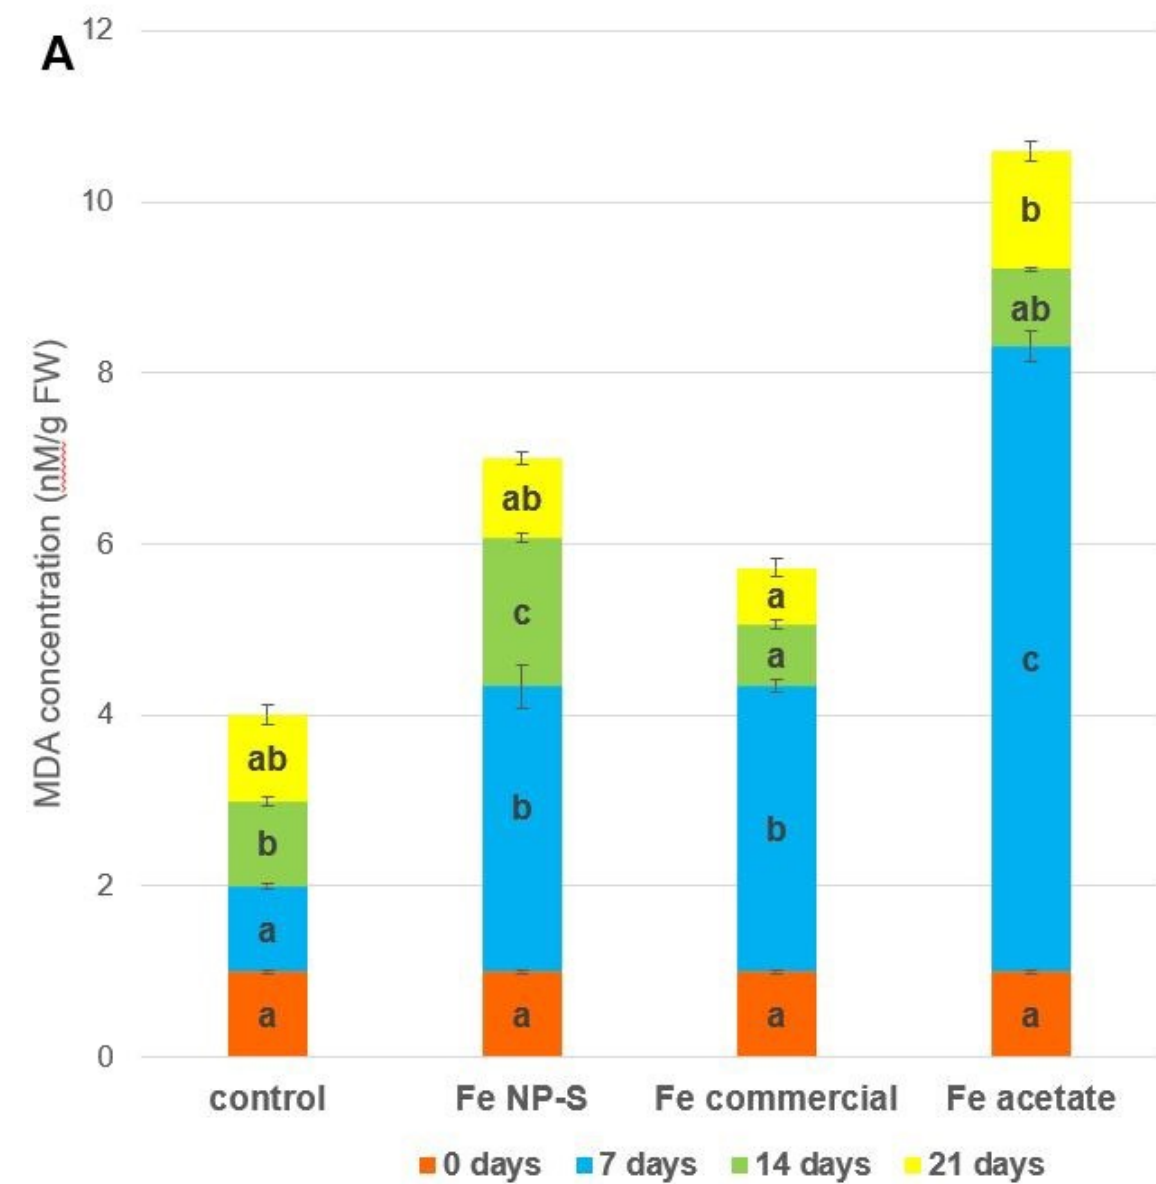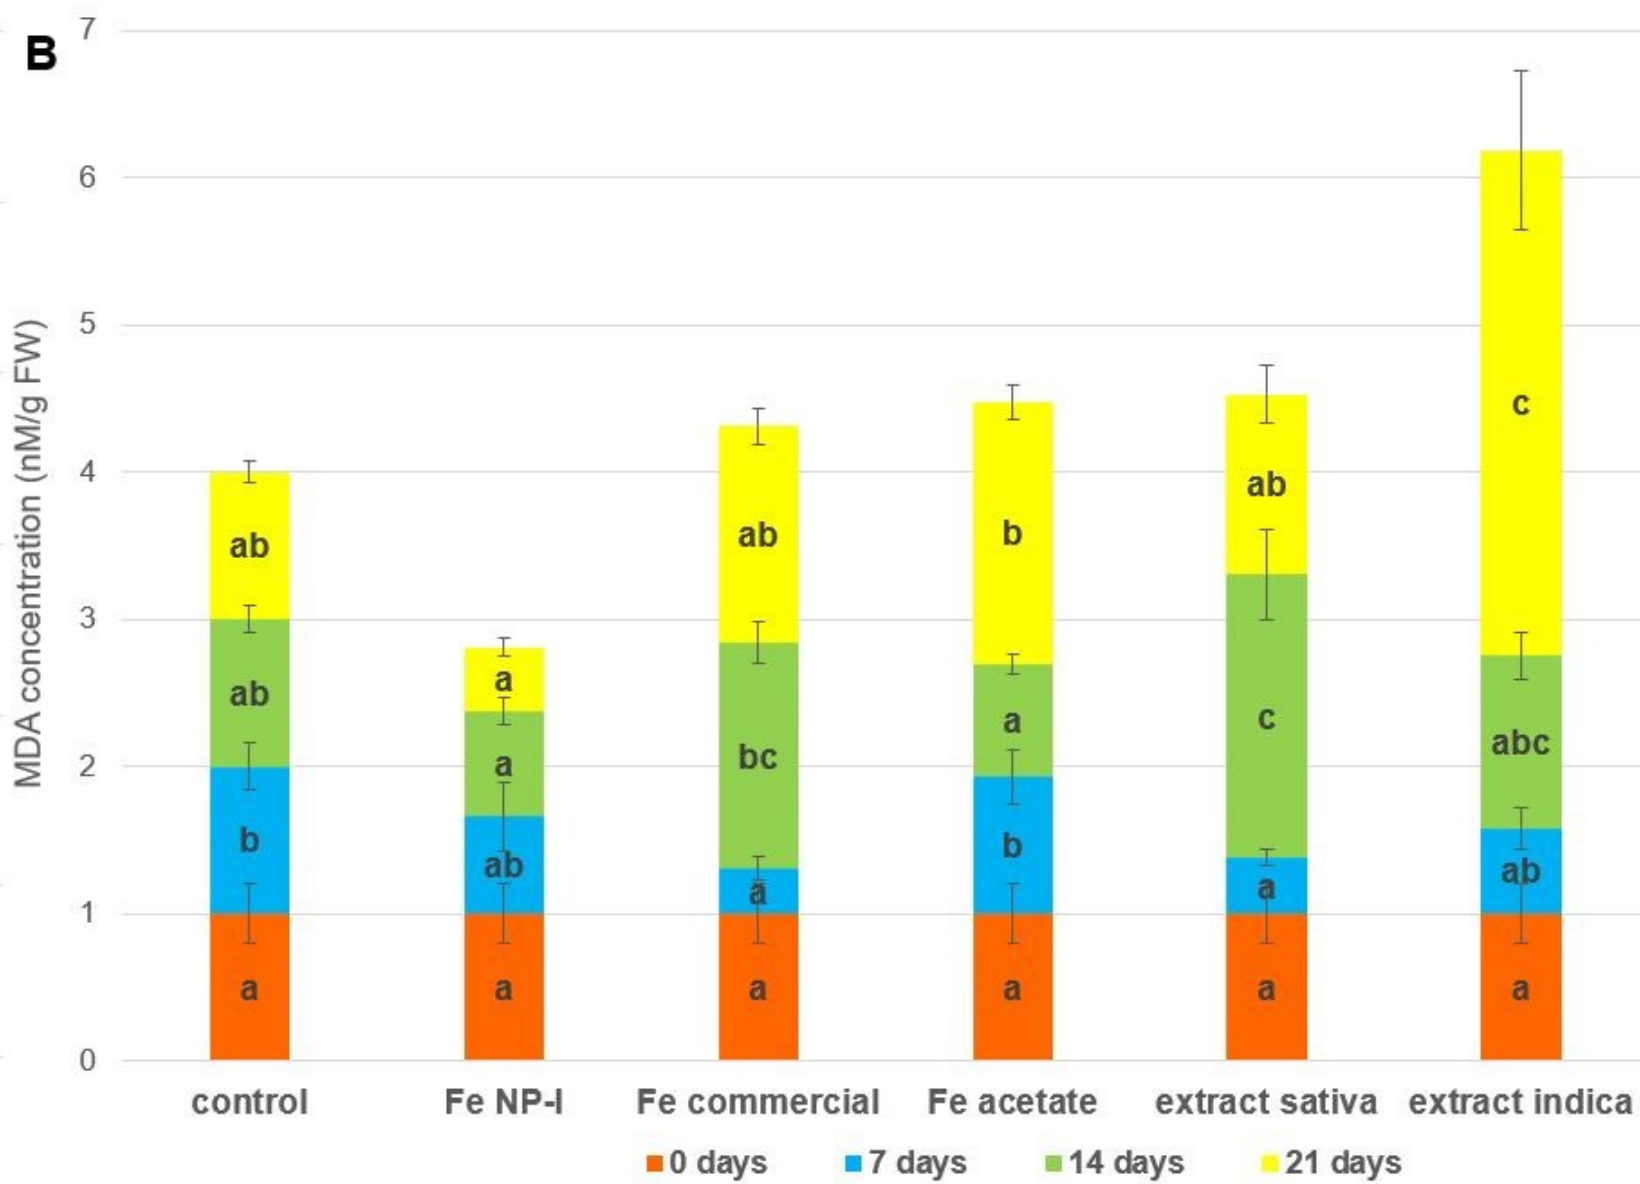

Supplement: d4en01018c8.pdf [file d4en01018c8.pdf]

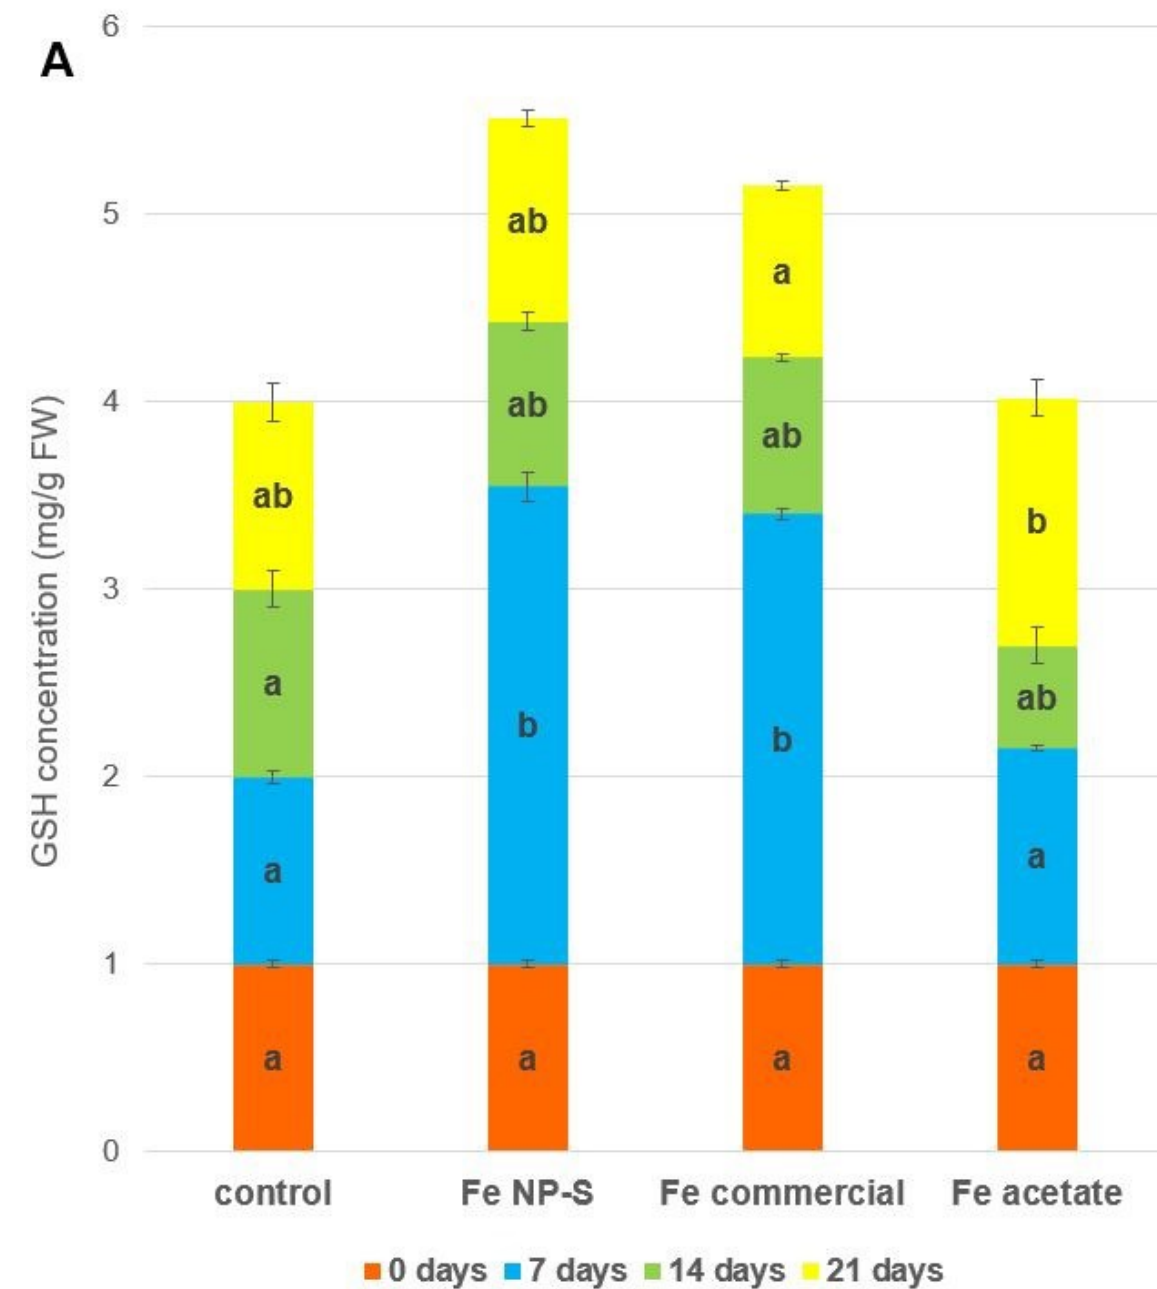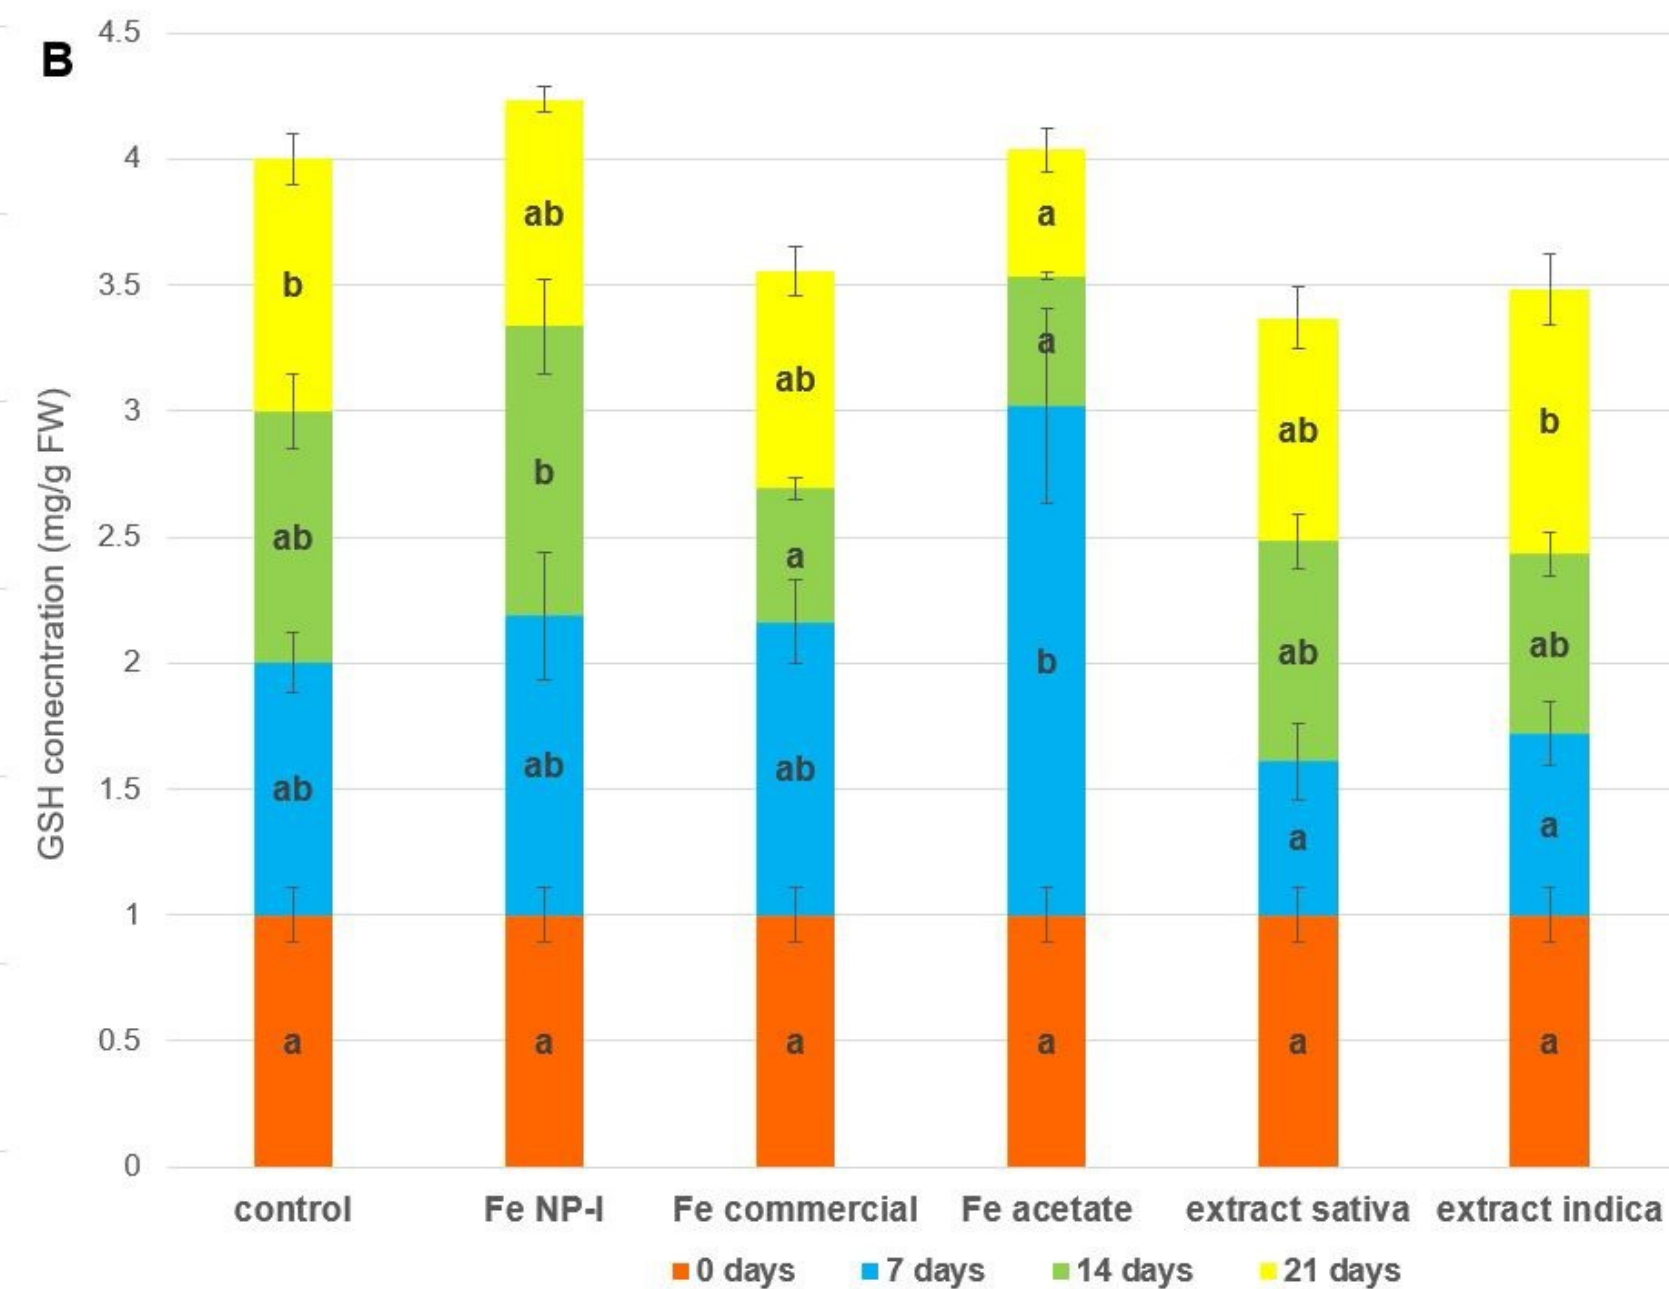

Supplement: d4en01018c9.pdf [file d4en01018c9.pdf]
